# Supplementary material for: LILRB4 knockdown inhibits aortic dissection development by regulating pyroptosis and the JAK2/STAT3 signaling pathway
Source: PubMed Central journal article supplement (PMC11227527; doi:10.1038/s41598-024-66482-3), 2024-07-06

Figure1A LILRB4

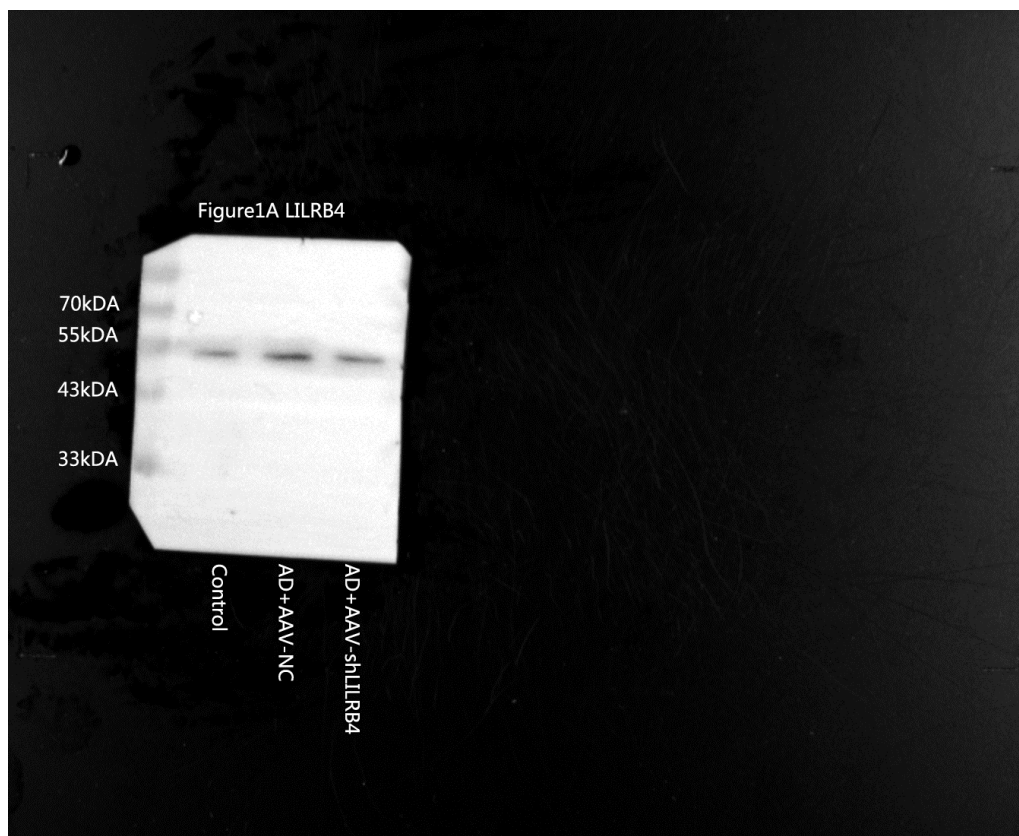

Figure1A  $\beta$ -actin

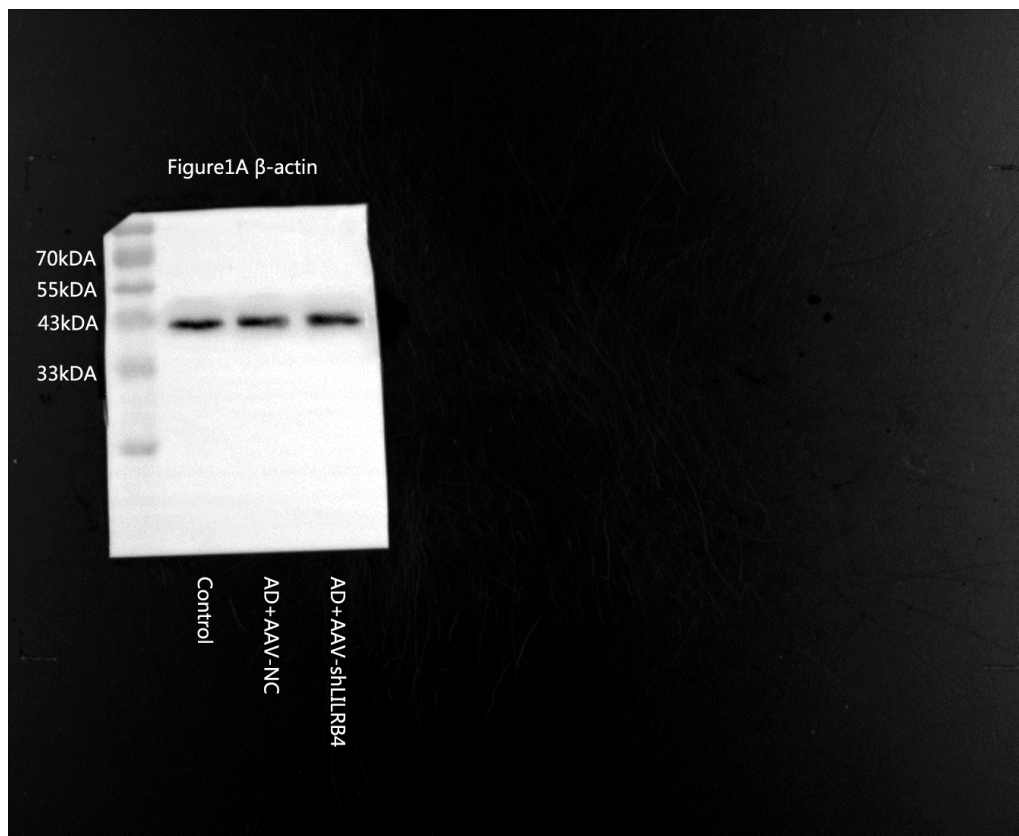

Figure2 LOX

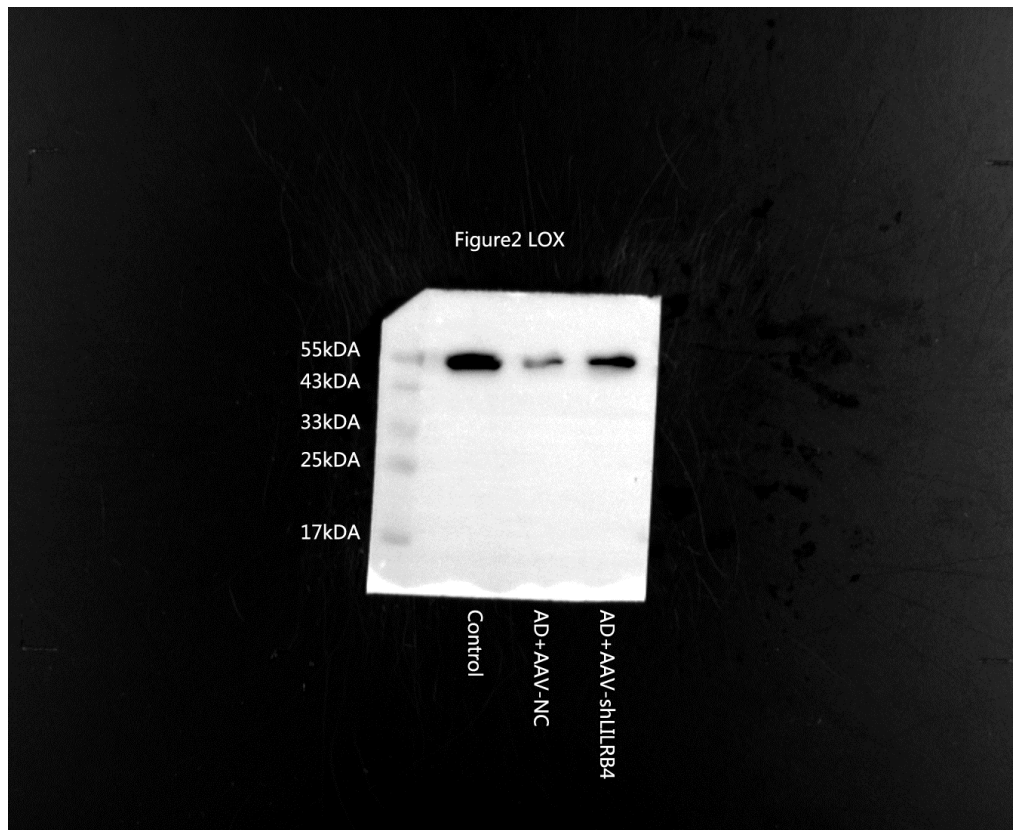

Figure2 MMP-2

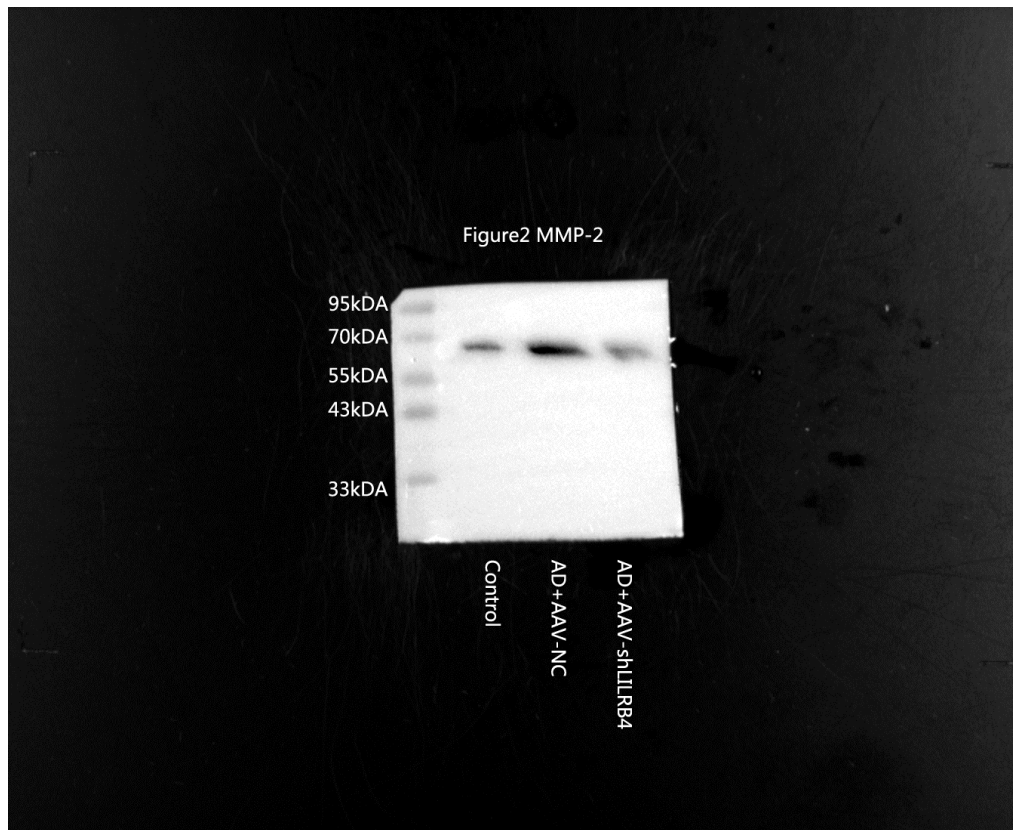

Figure2 MMP-9(Contains multiple exposures)

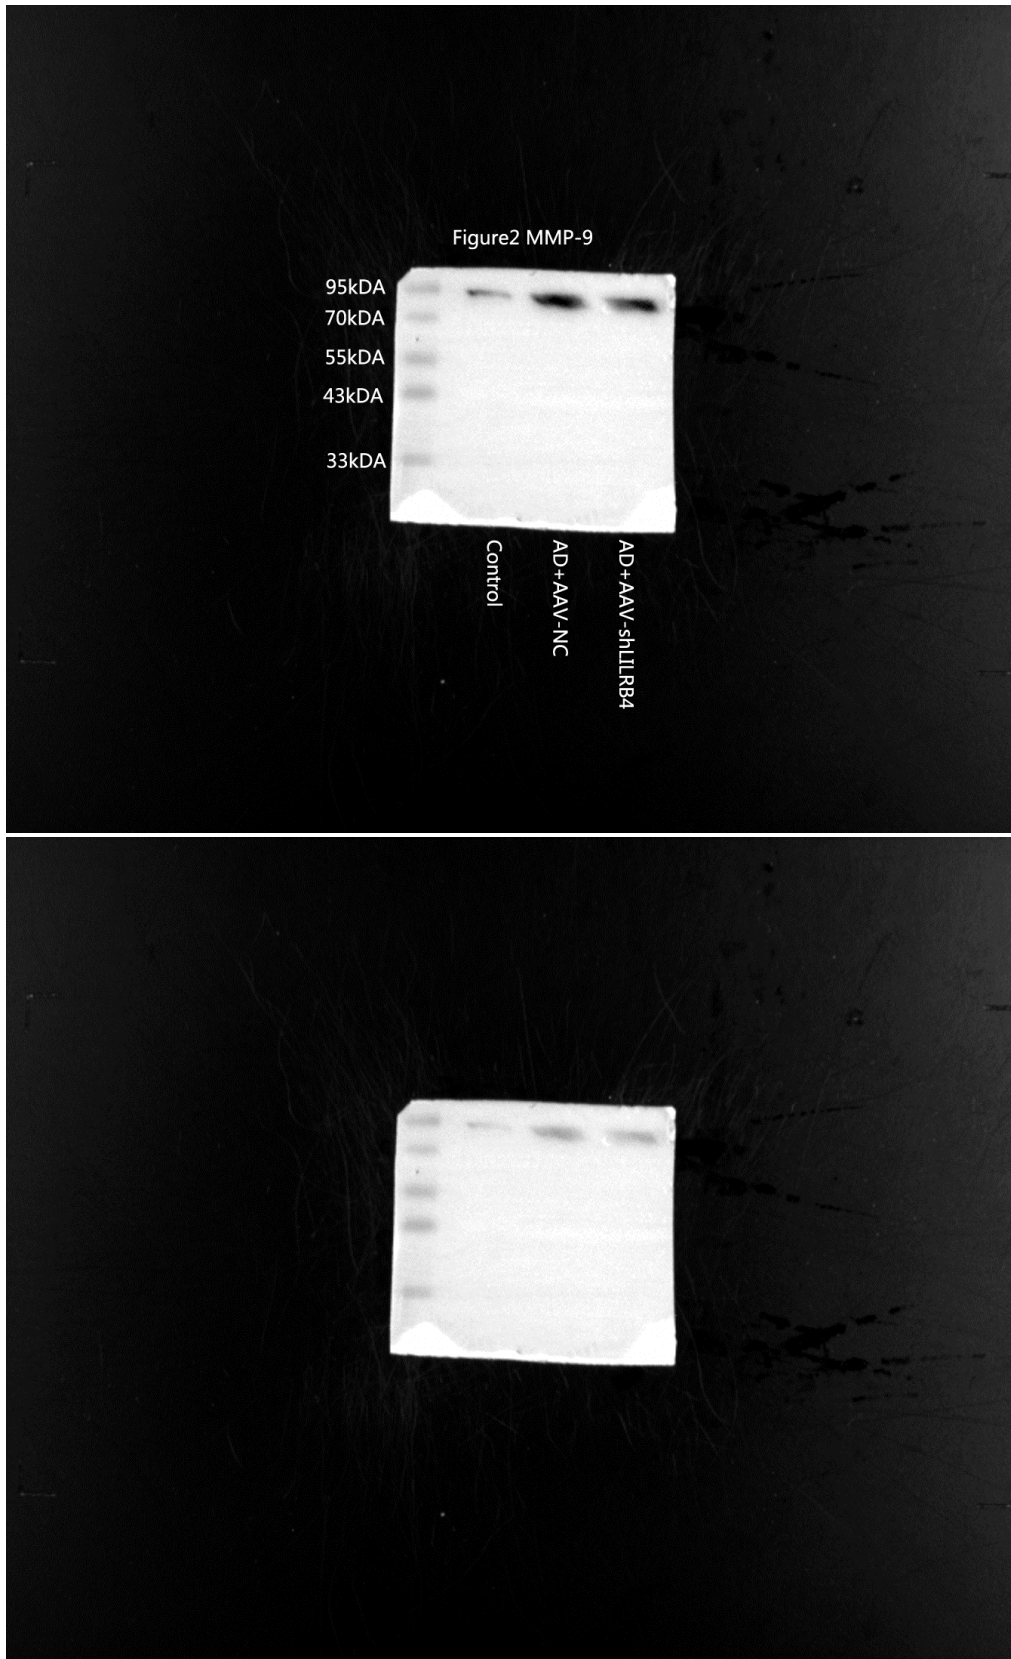



Figure2 SM22 $\alpha$  (Contains multiple exposures)

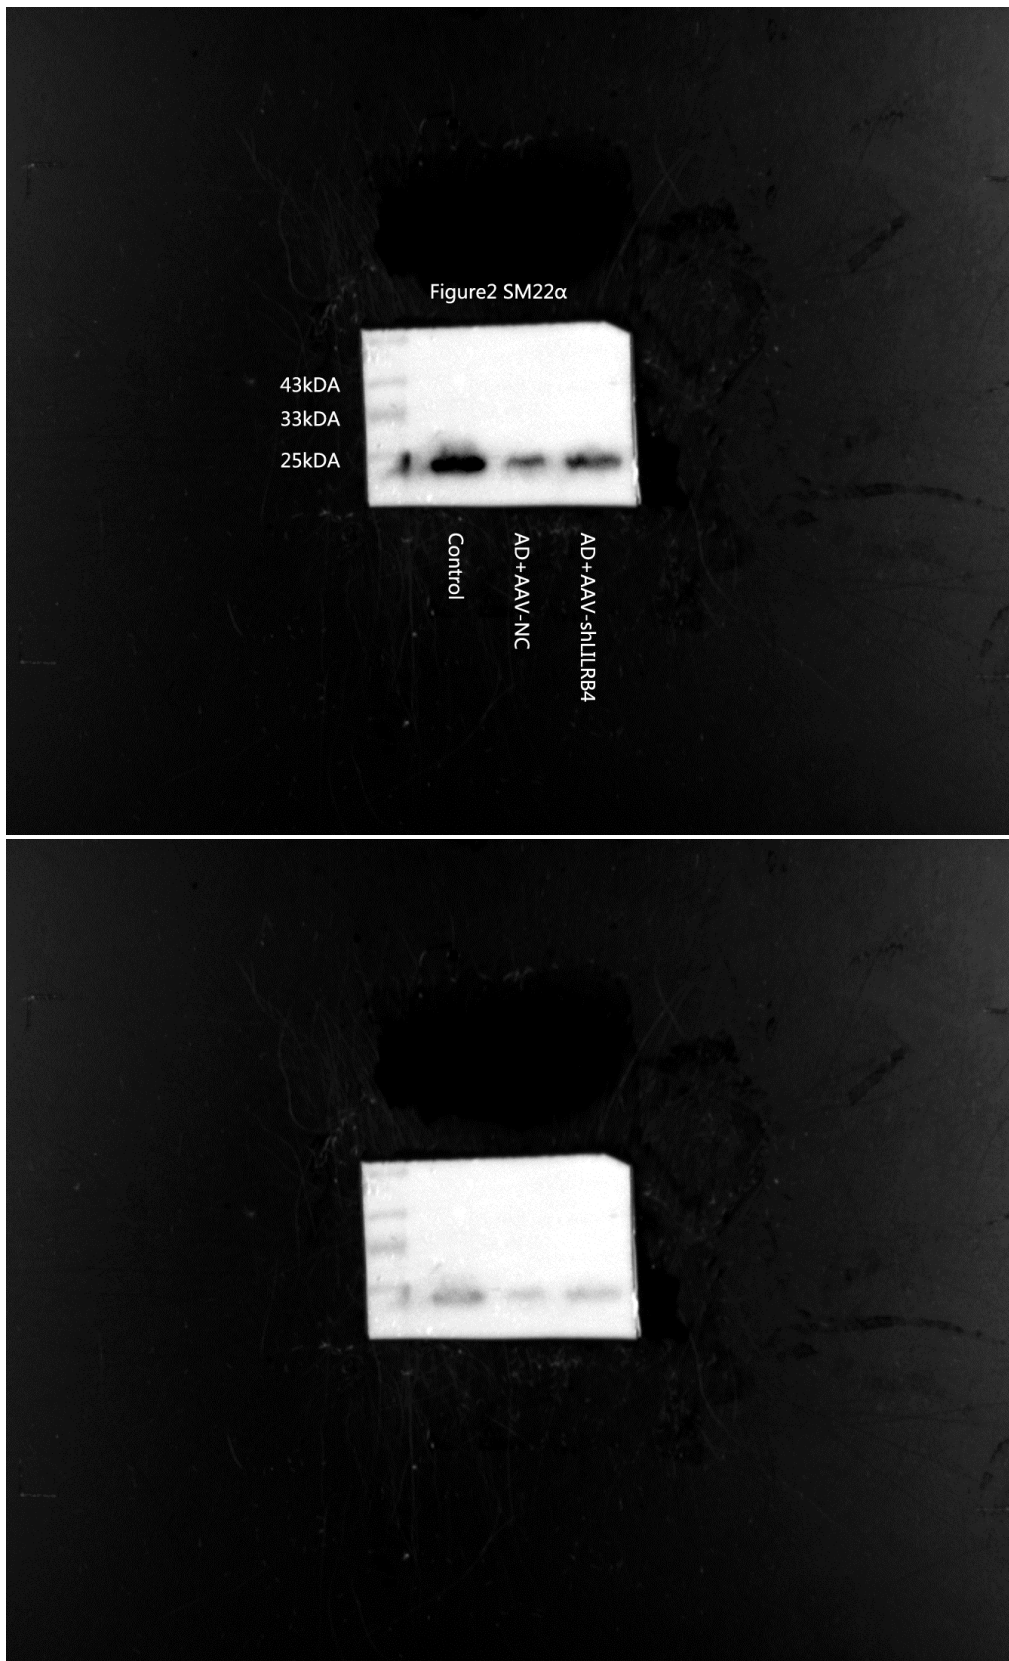

Figure2  $\alpha$ -SMA (Contains multiple exposures)

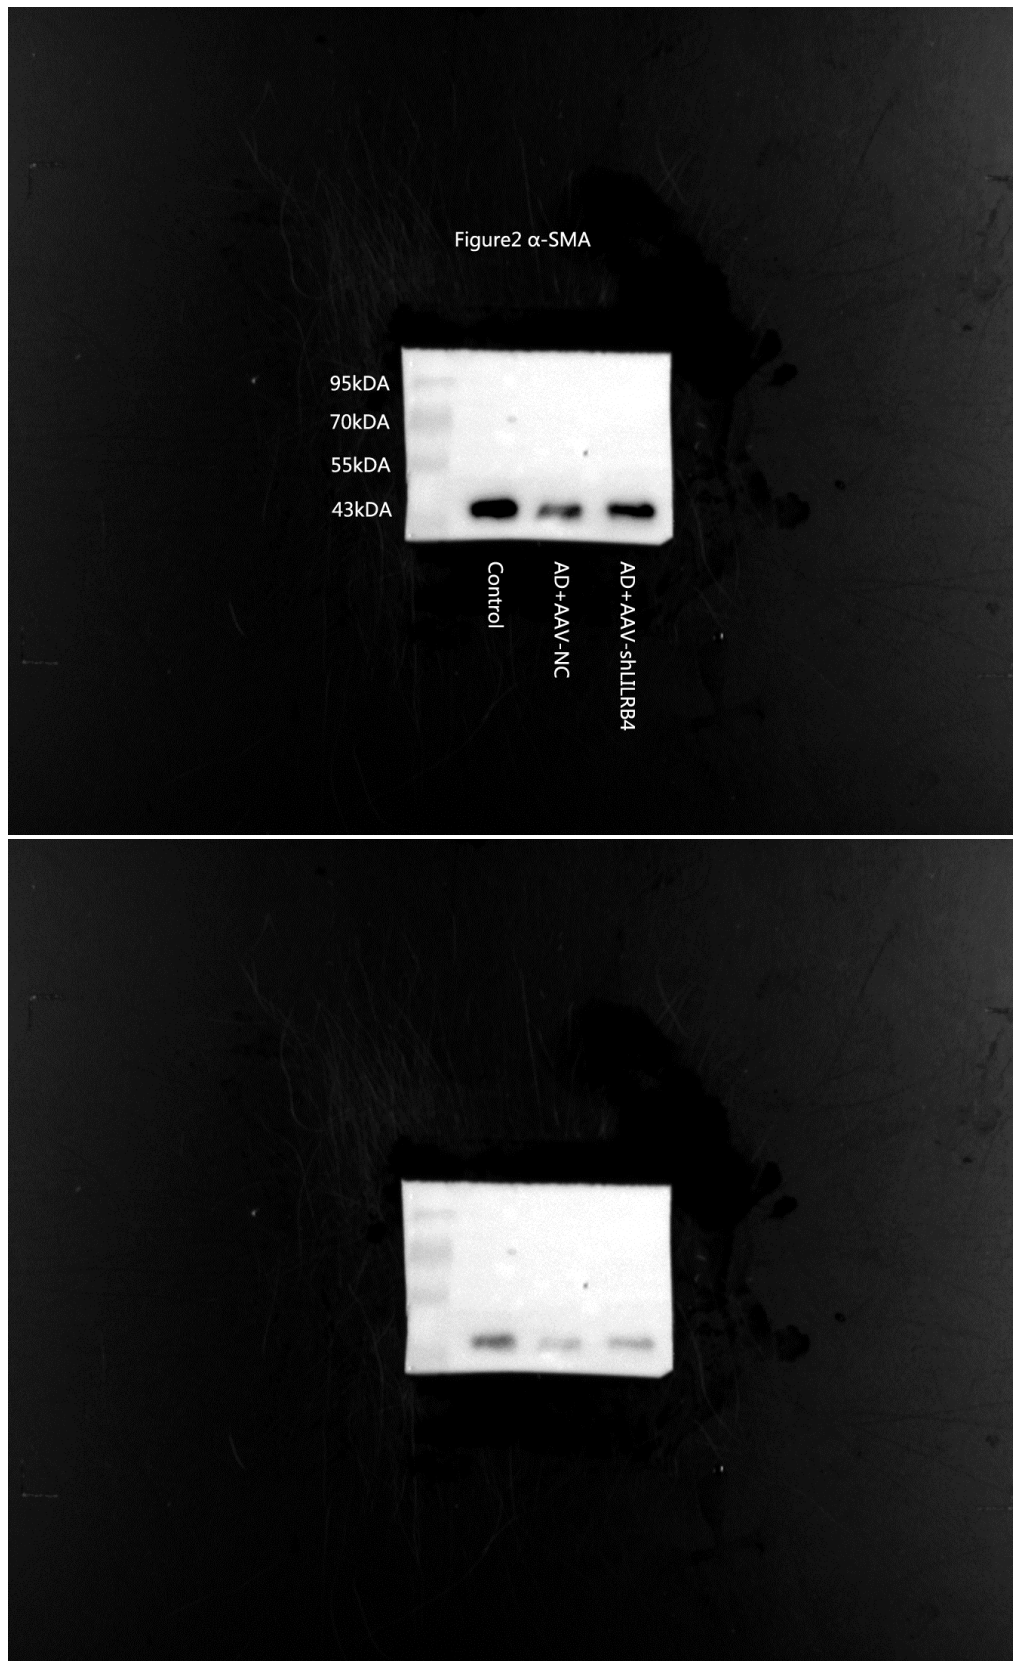

Figure2  $\beta$ -actin

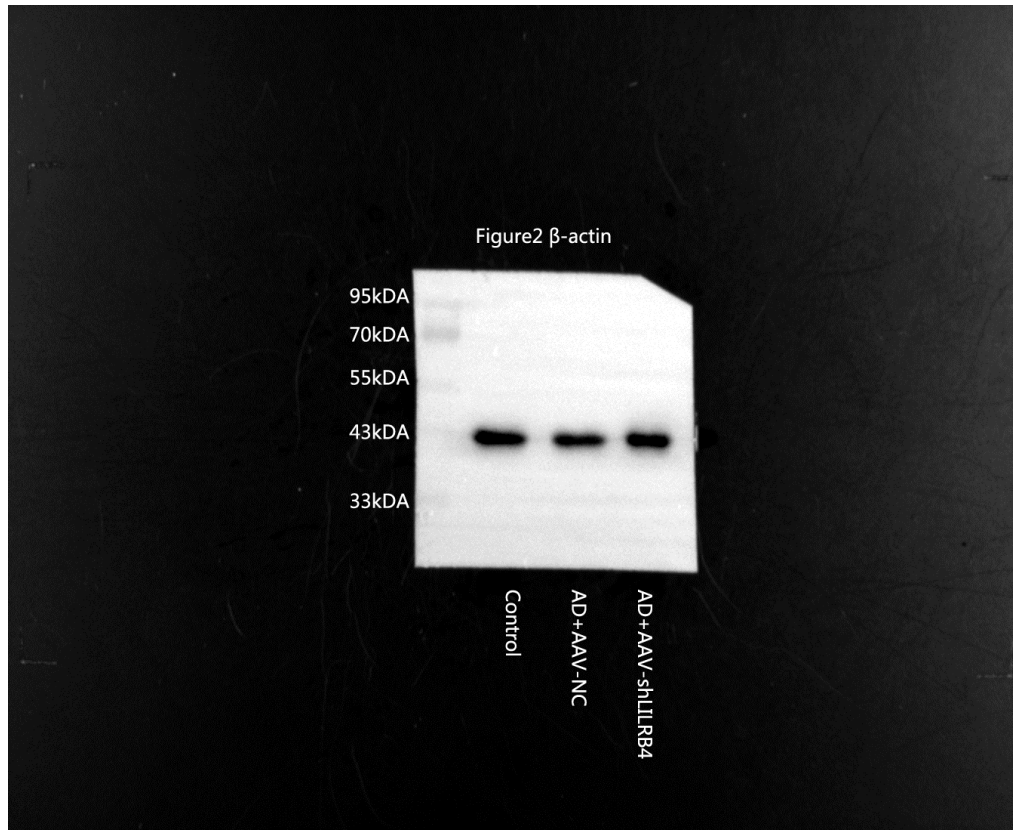

Figure3B Caspase-1(Contains multiple exposures)

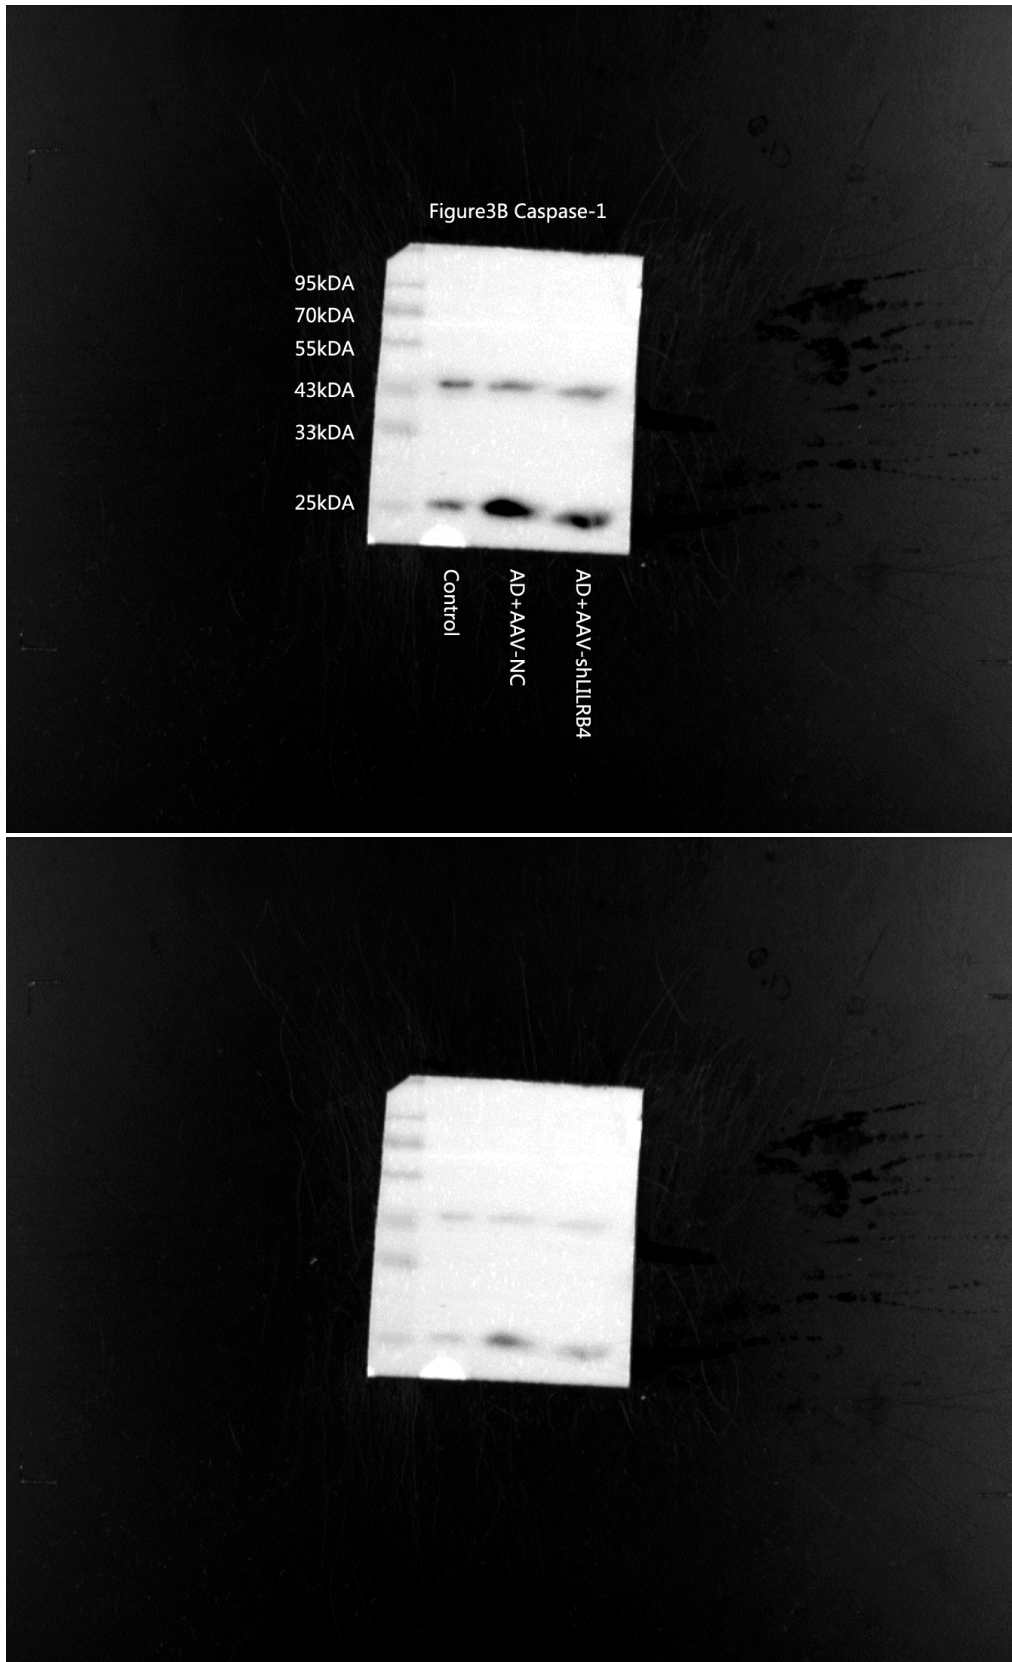

Figure3B GSDMD-N(Contains multiple exposures)

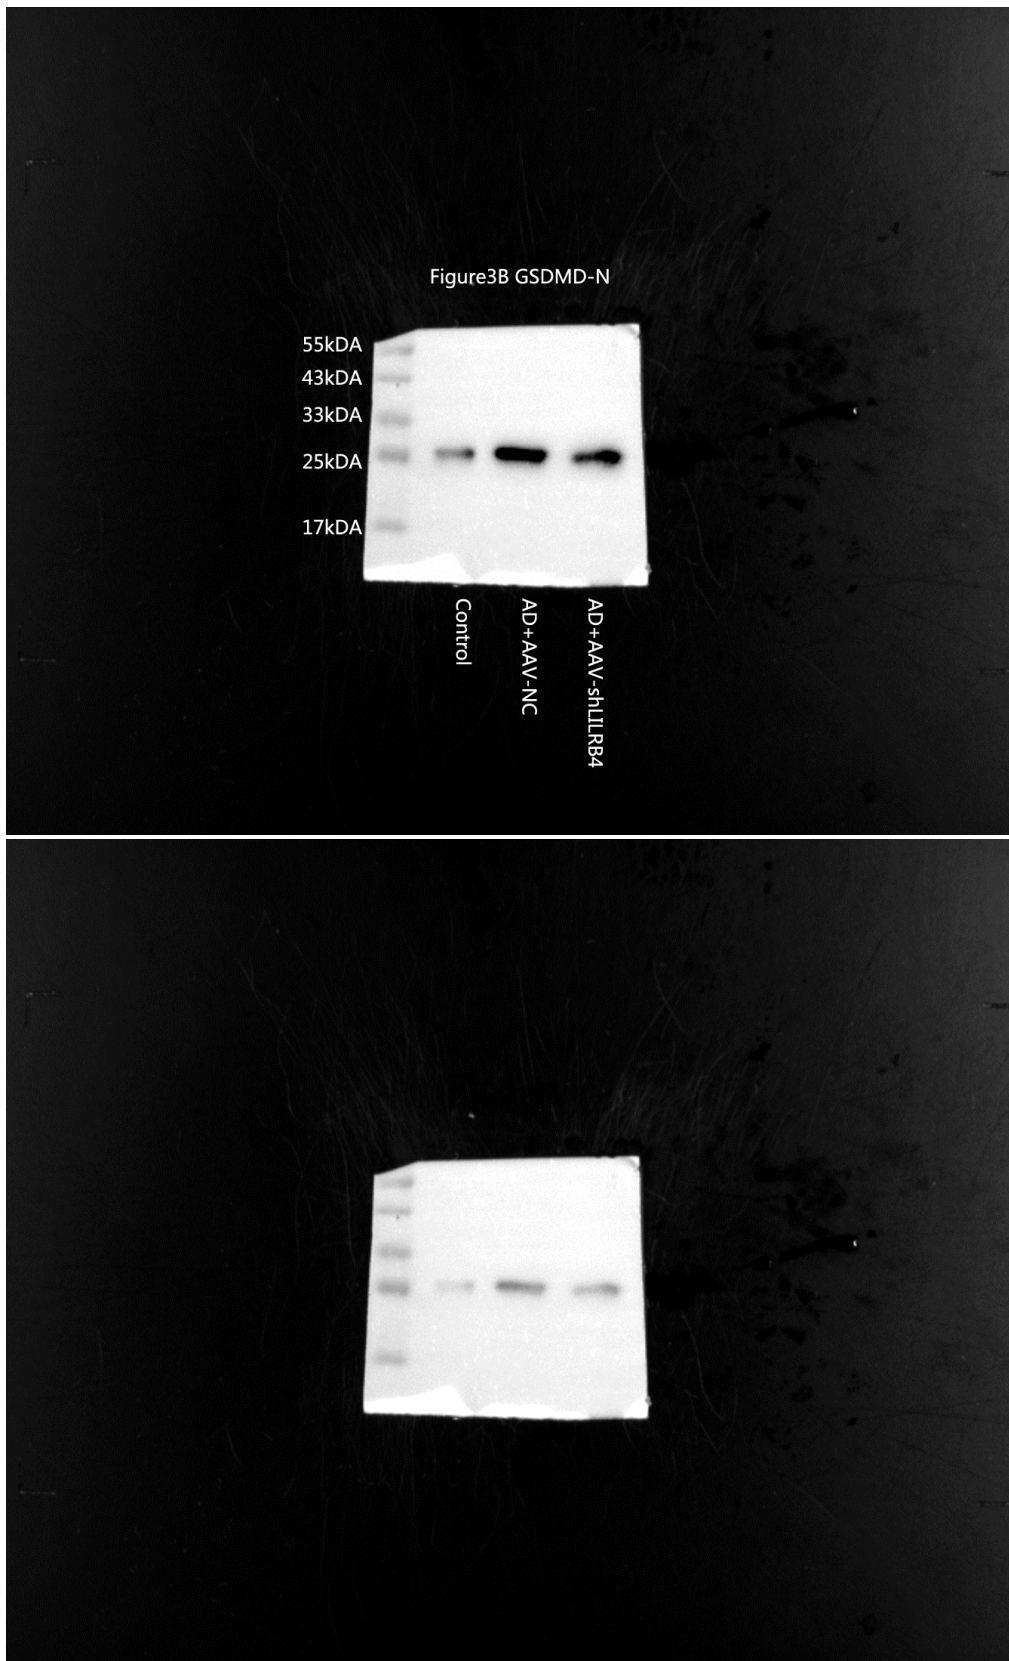



Figure3B NLRP3(Contains multiple exposures)

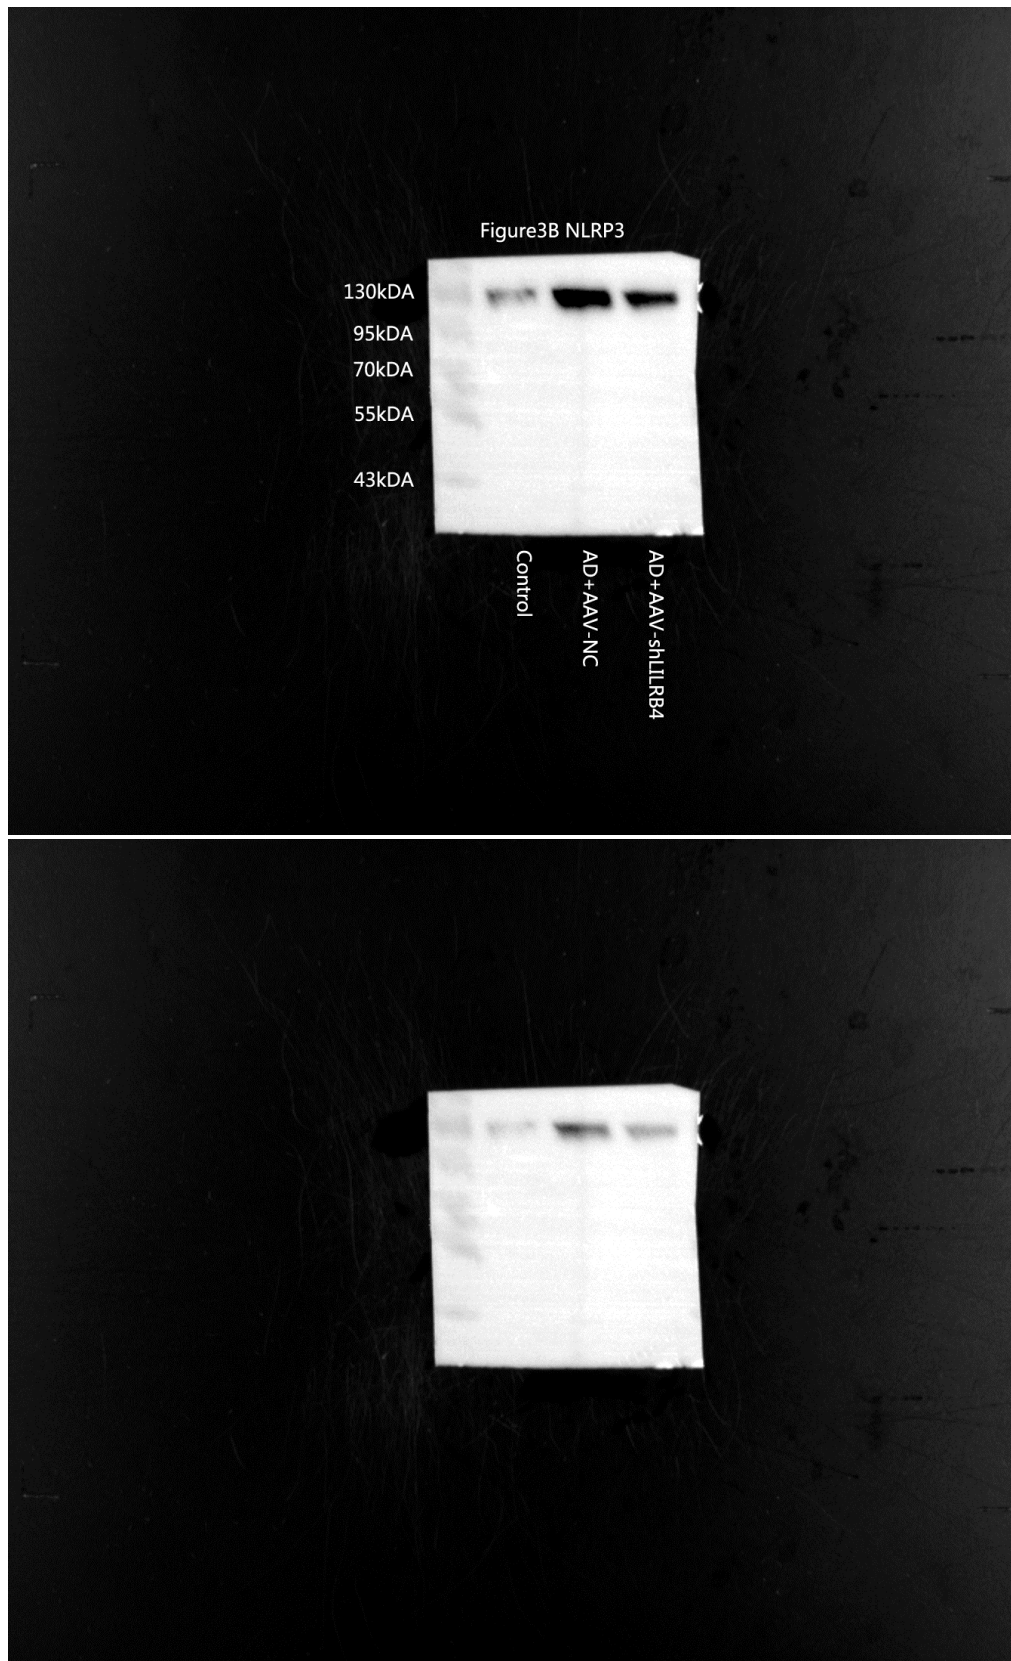



Figure3B  $\beta$ -actin

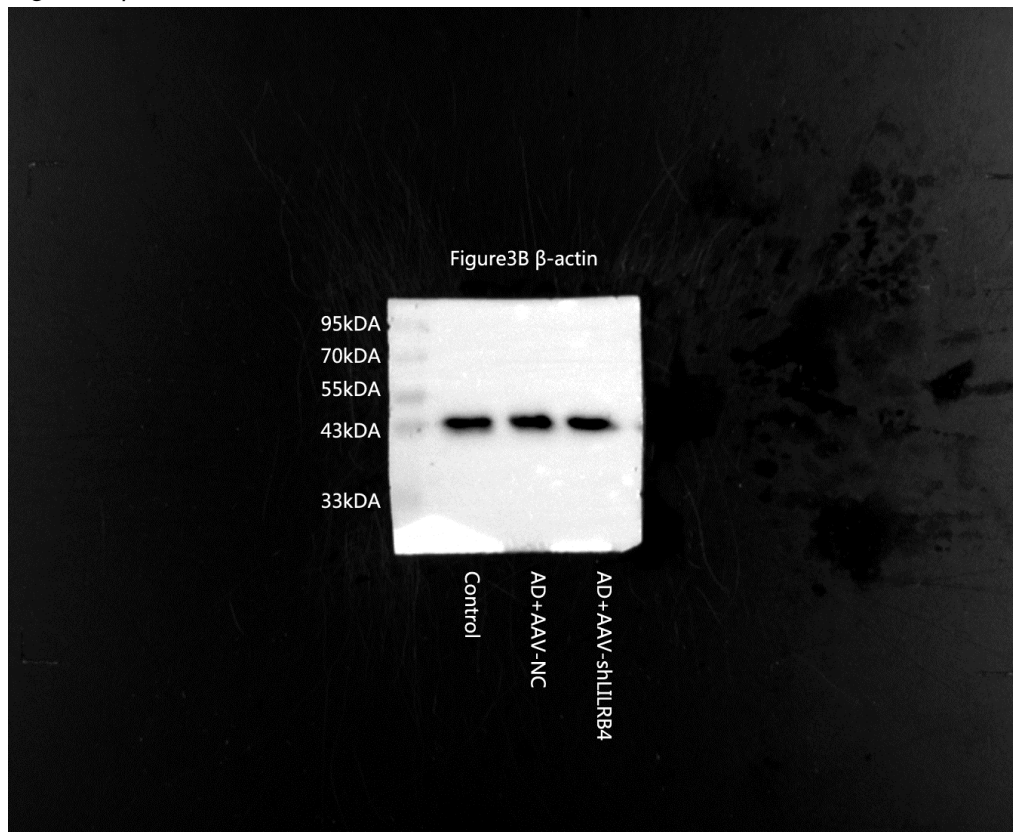

Figure4A LOX(Contains multiple exposures)

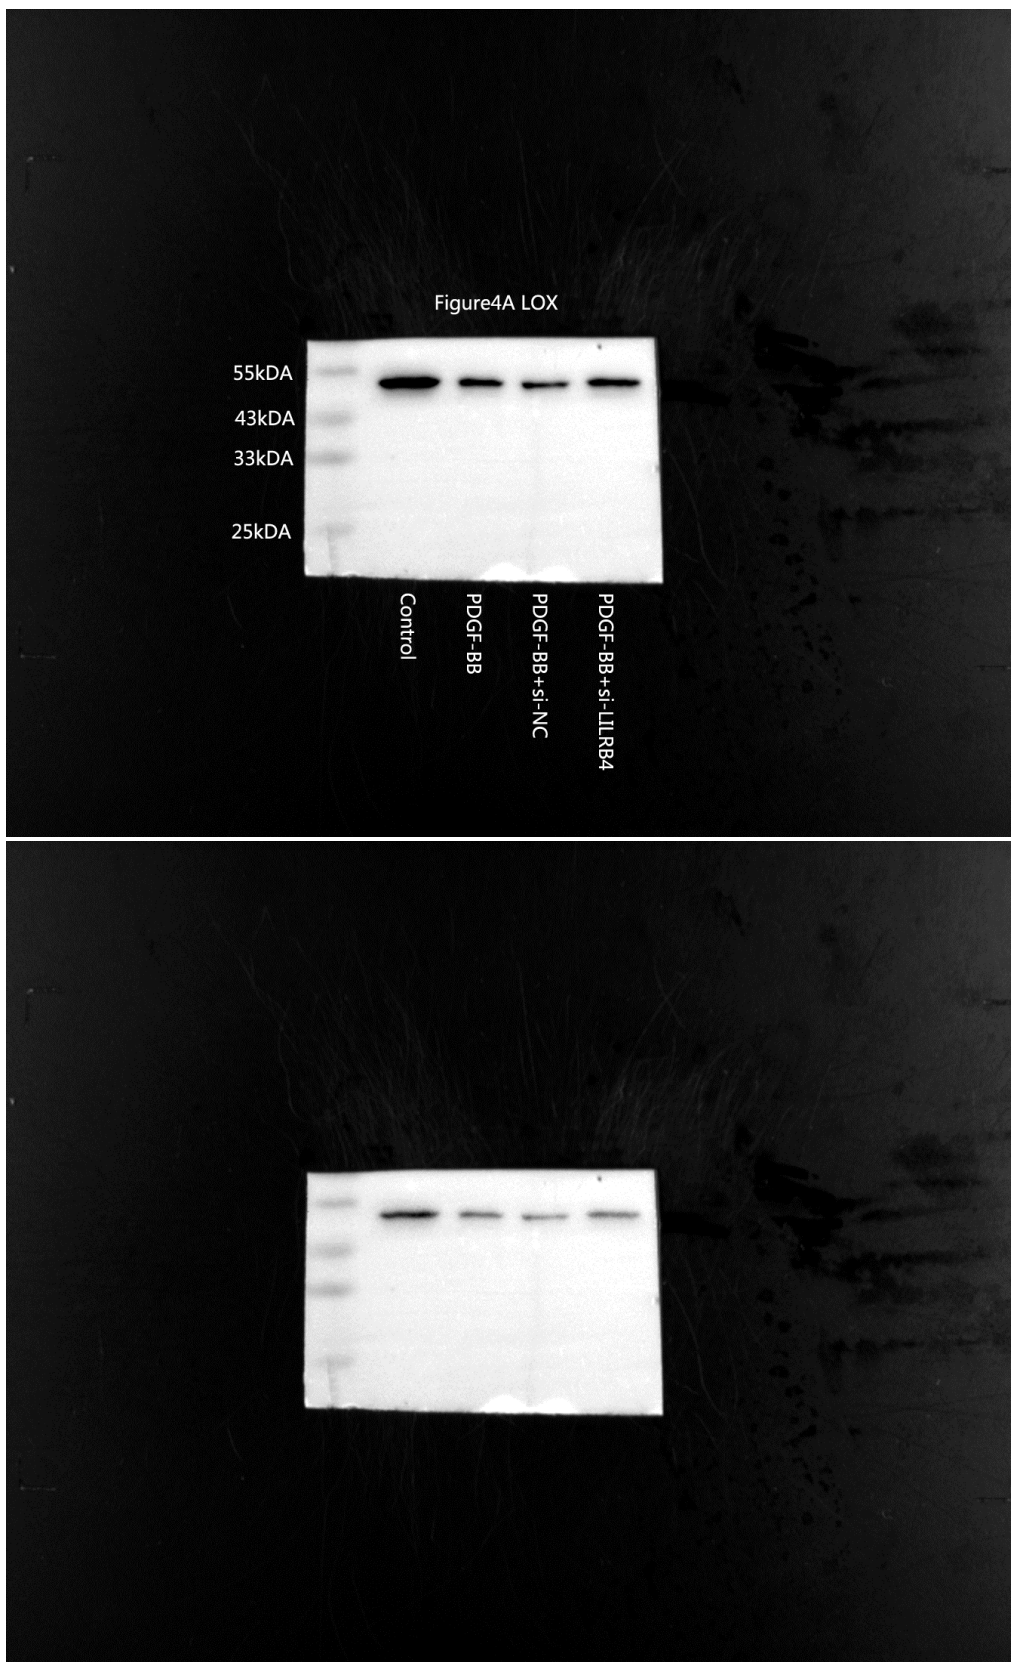

Figure4A MMP-2(Contains multiple exposures)

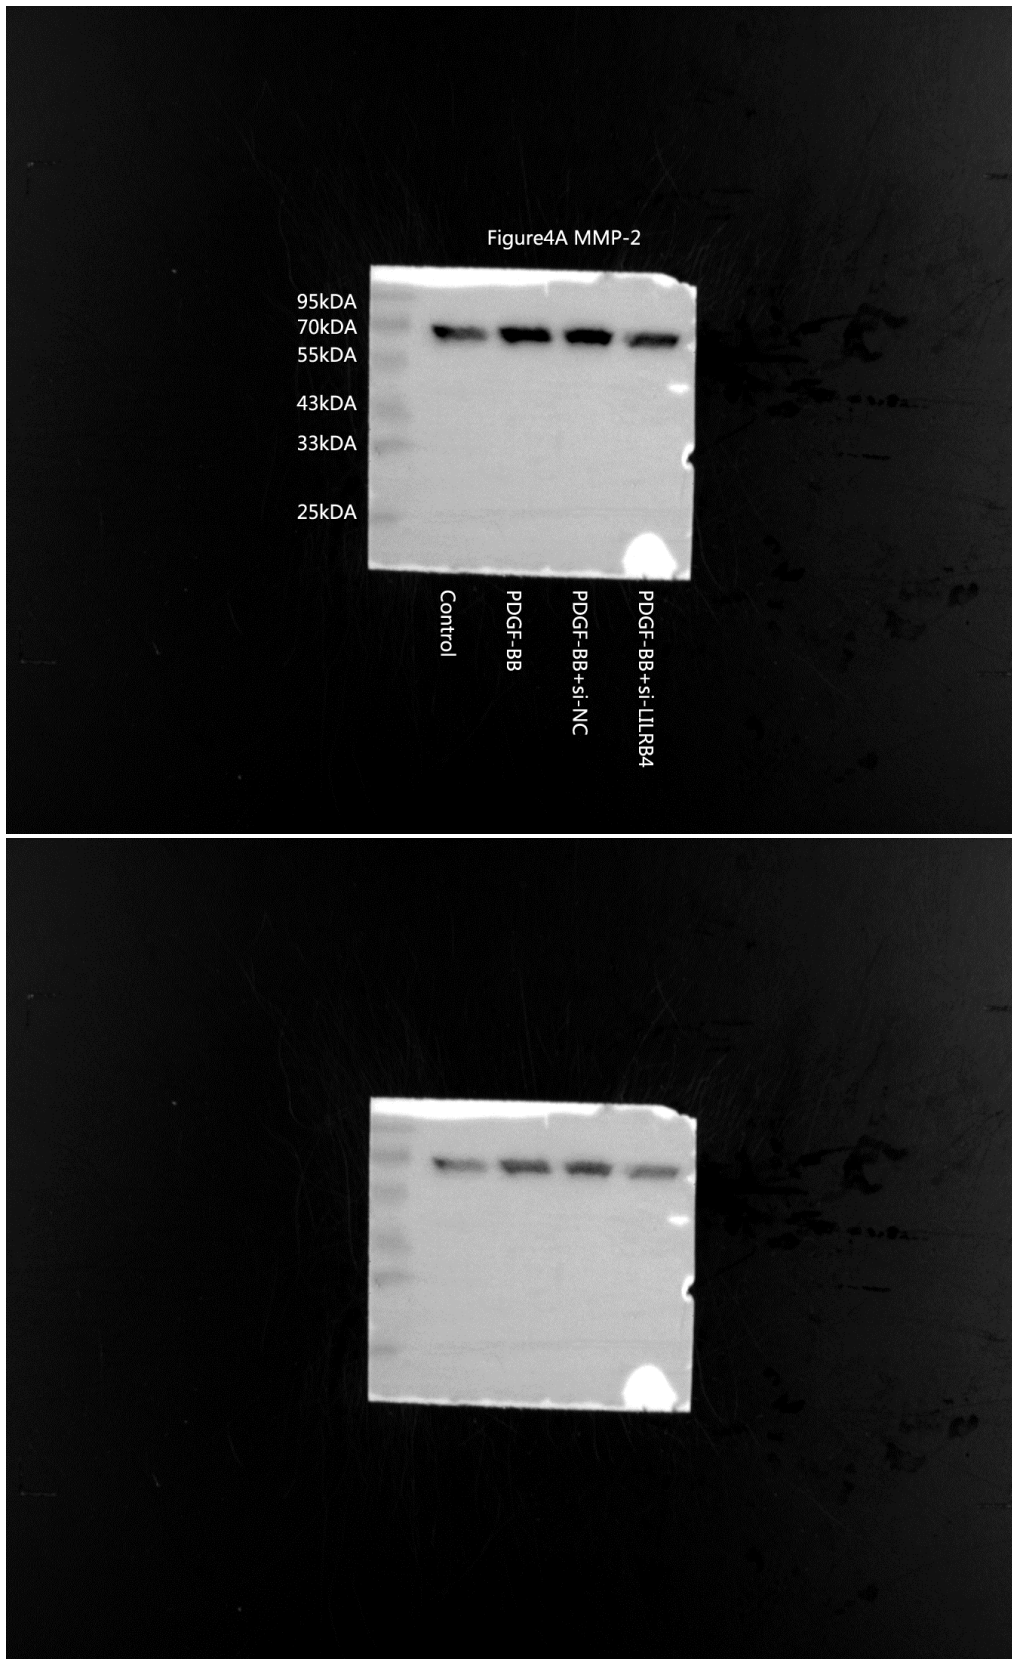

Figure4A MMP-9(Contains multiple exposures)

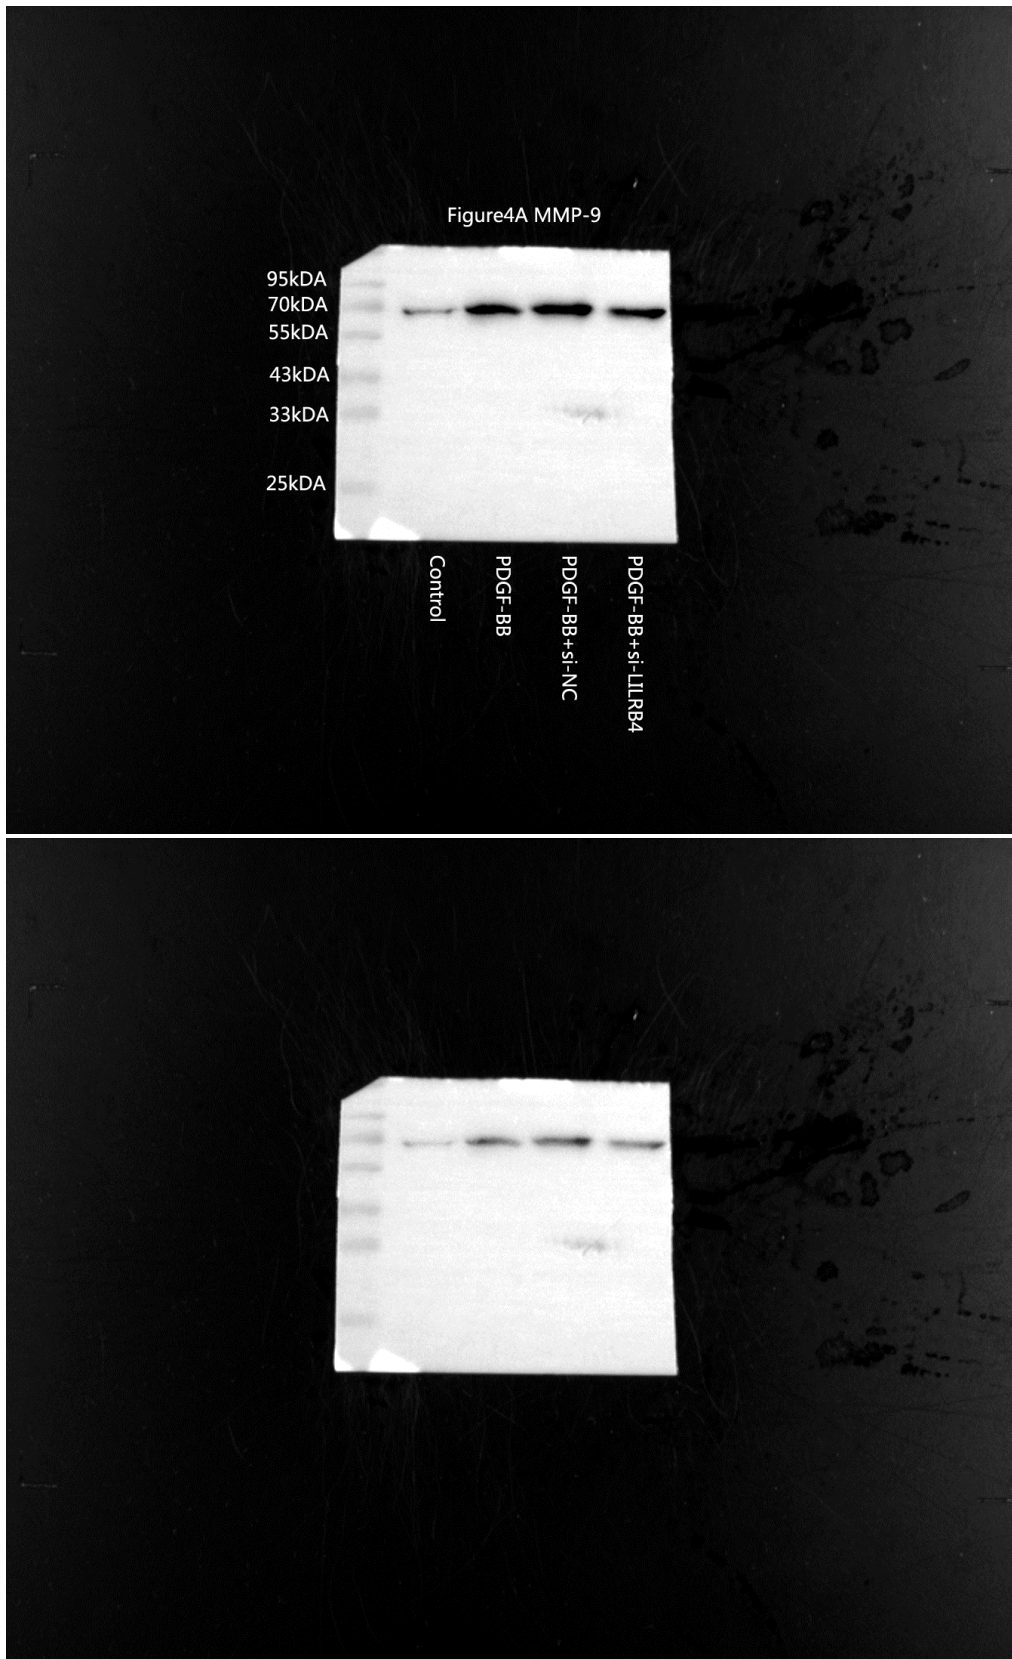

Figure4A S100A4(Contains multiple exposures)

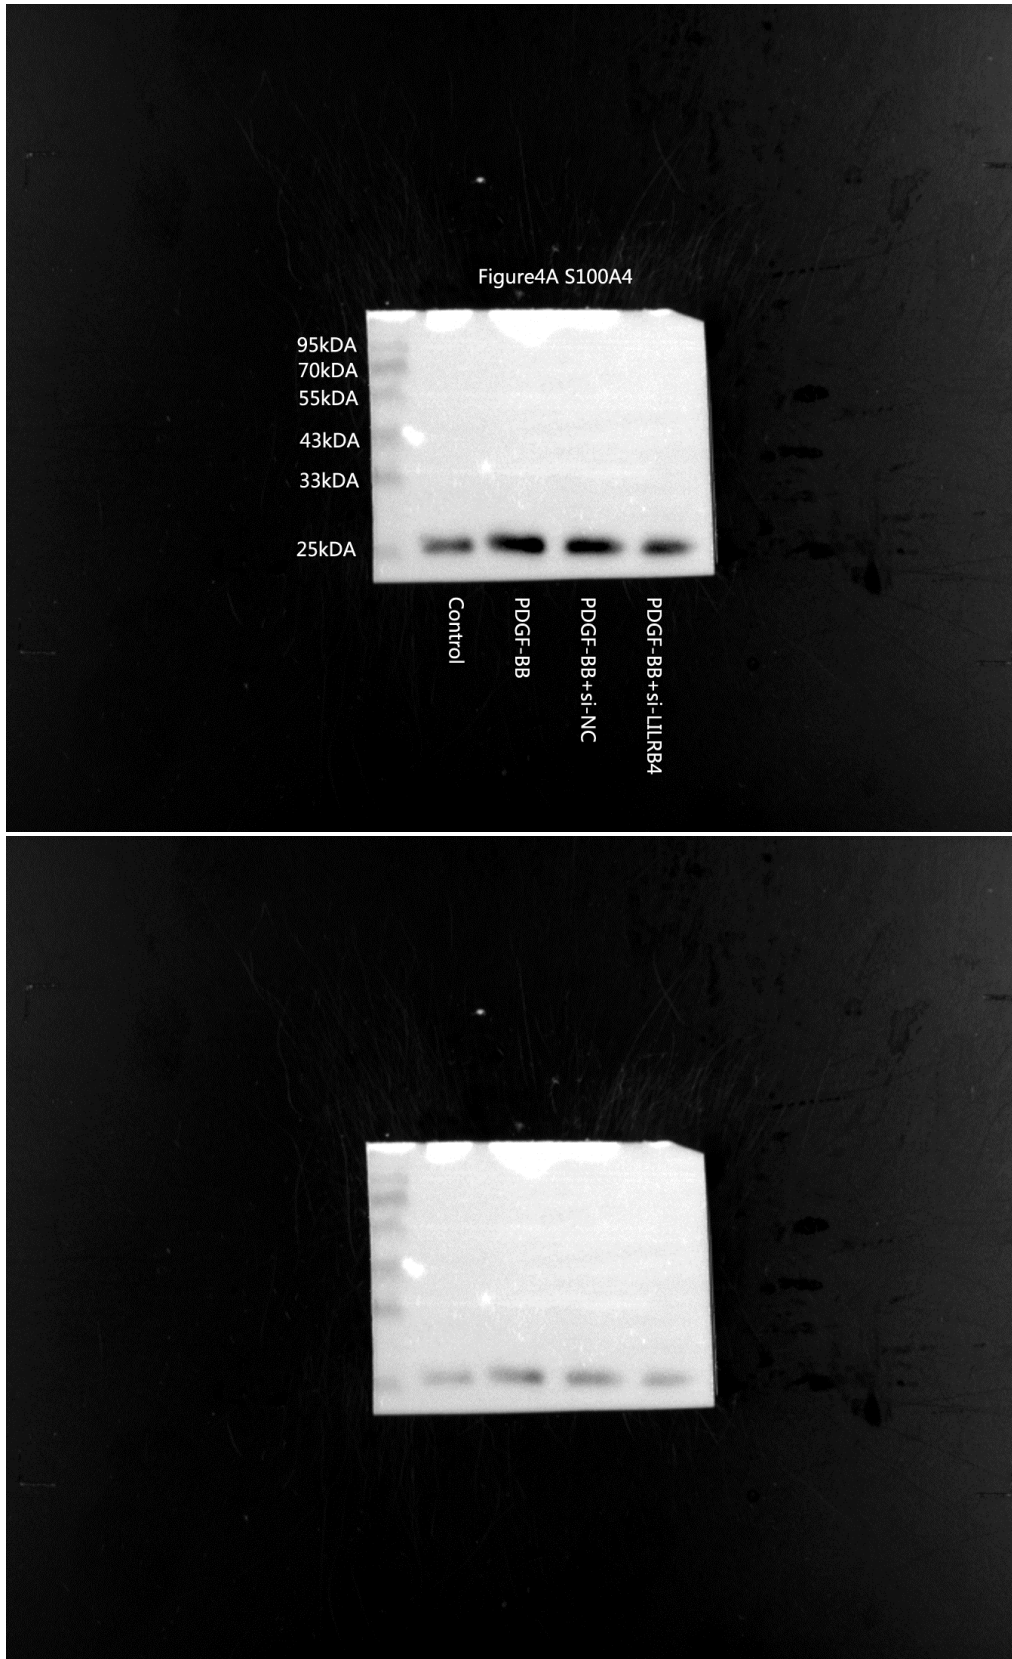



Figure4A SM22- $\alpha$

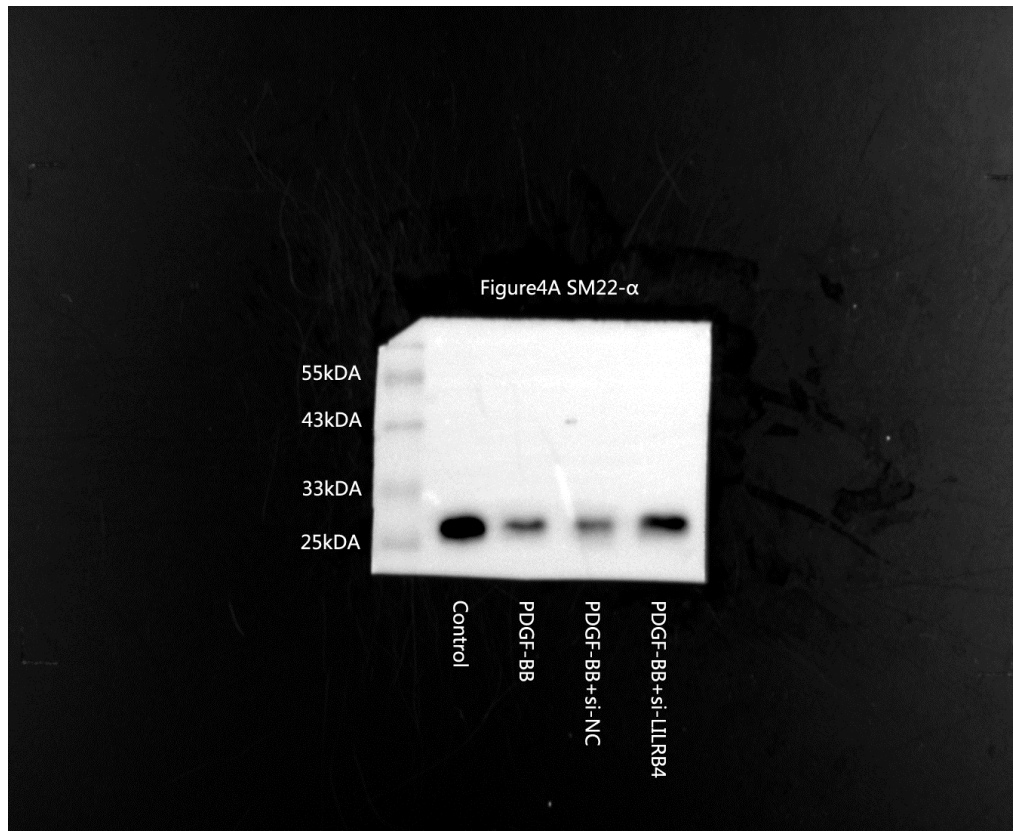



Figure4A  $\alpha$ -SMA

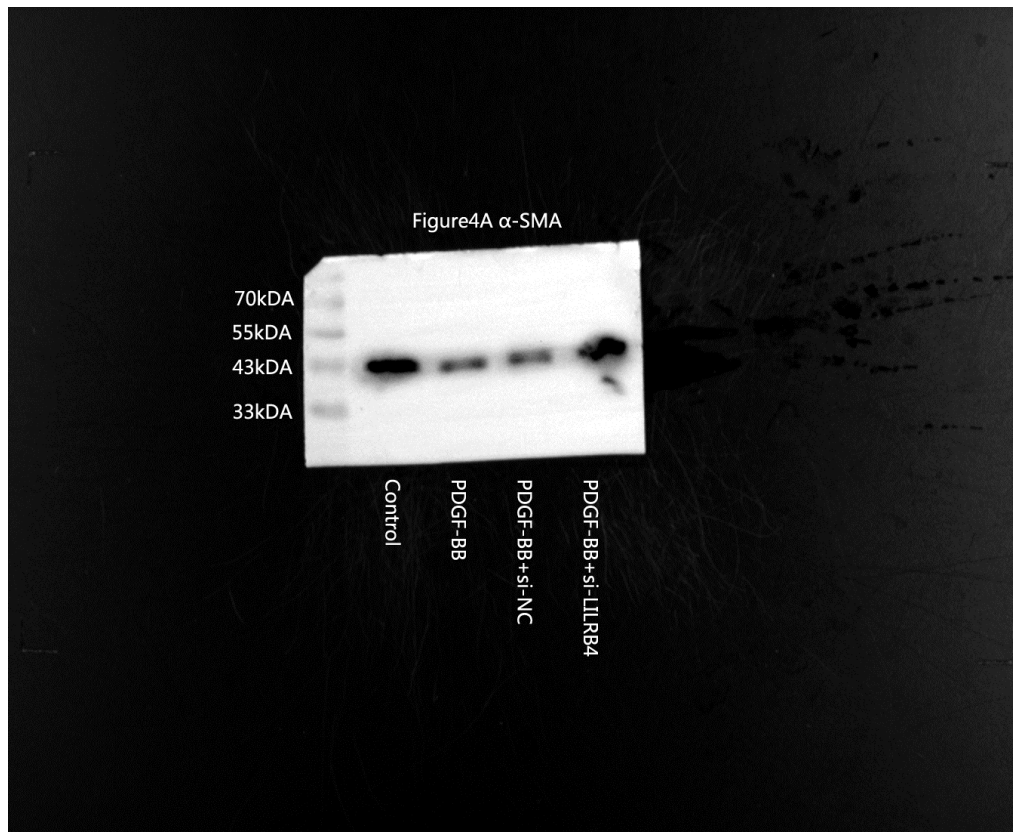

Figure4A  $\beta$ -actin(Contains multiple exposures)

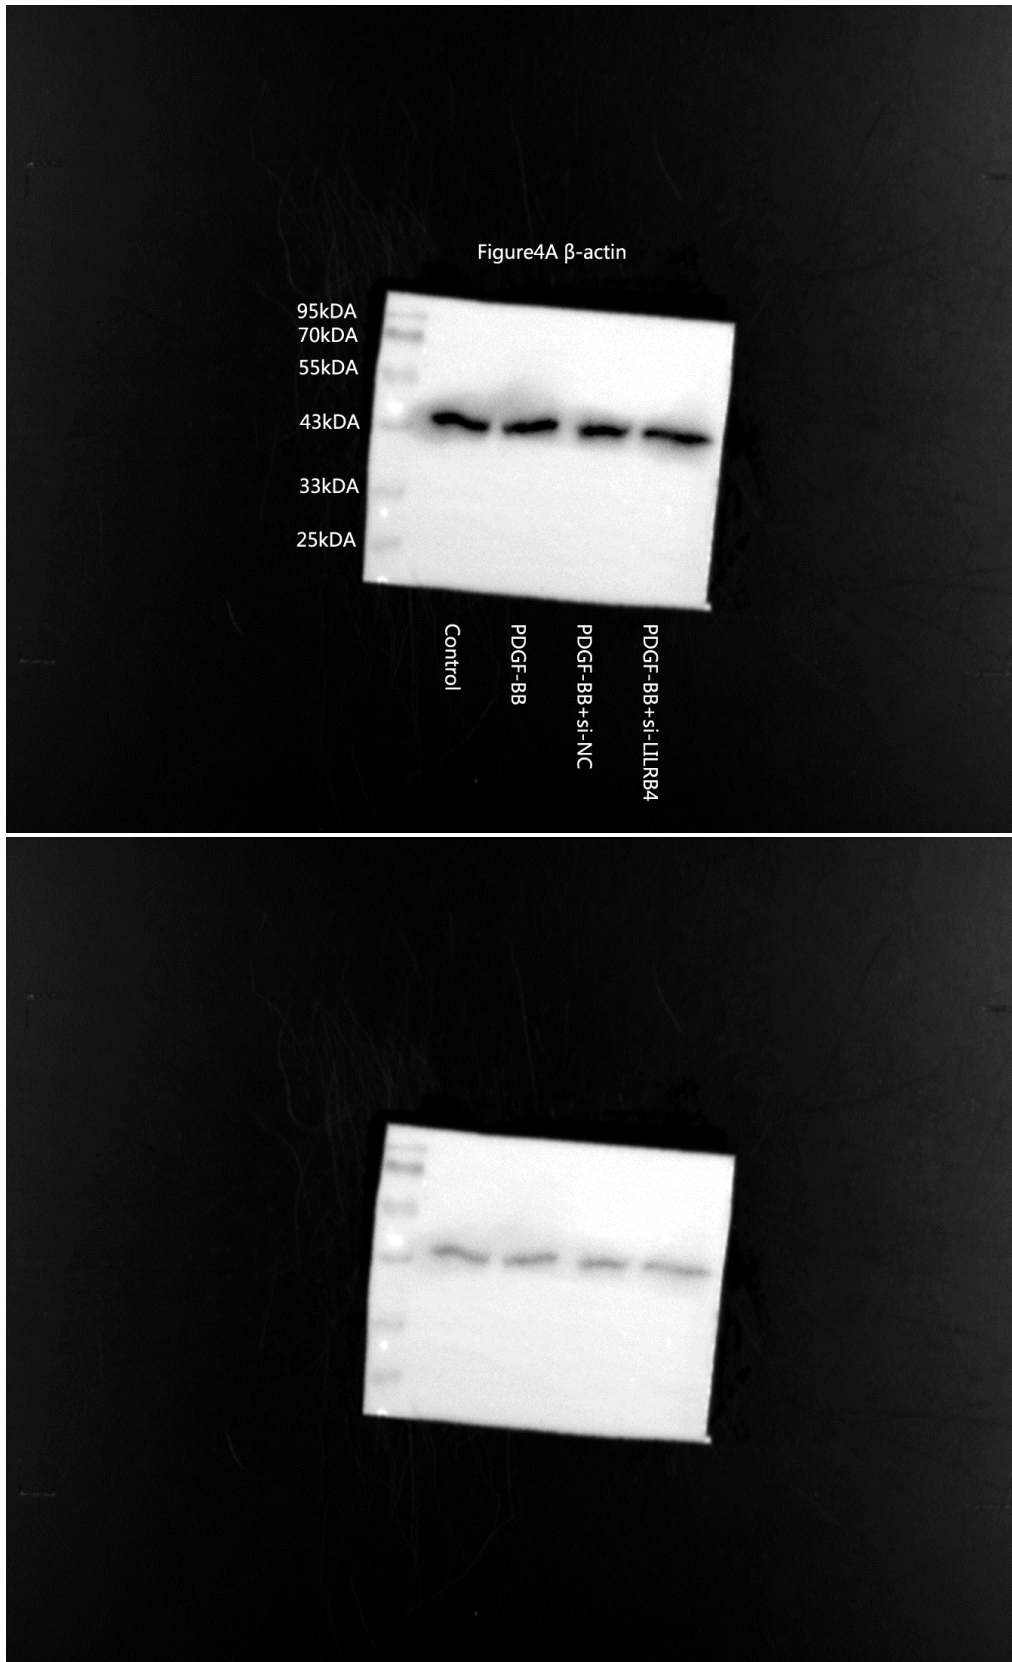

Figure5C JAK2

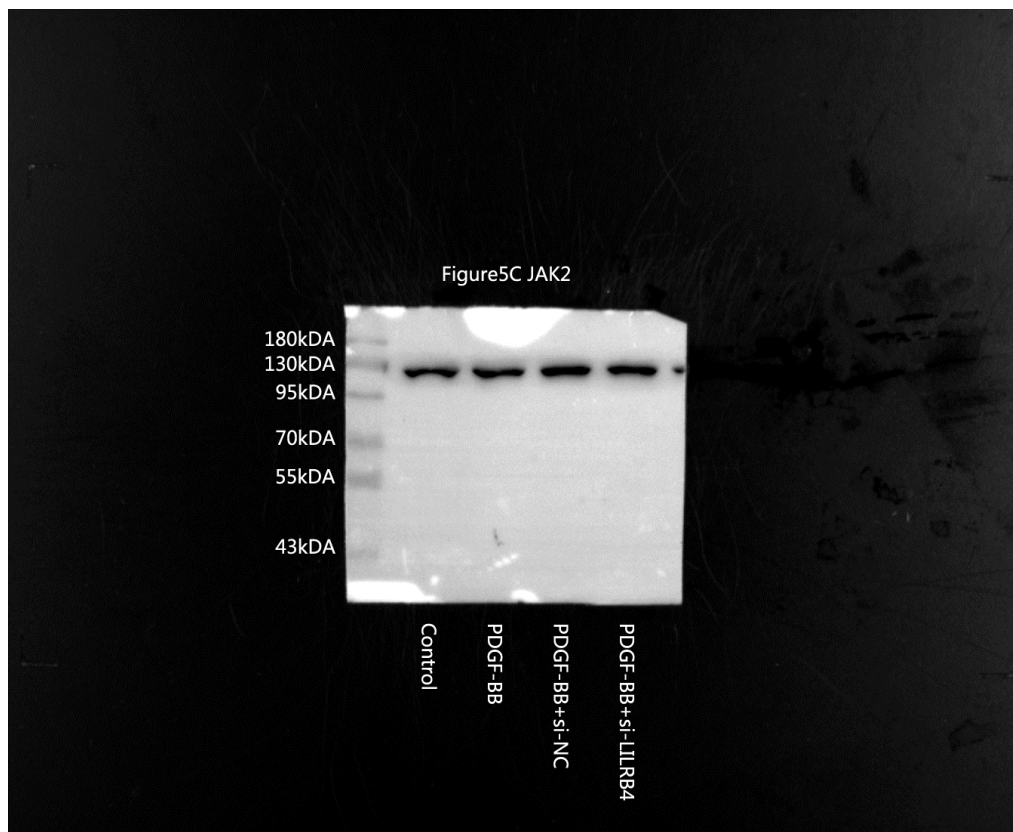

Figure5C p-JAK2(Contains multiple exposures)

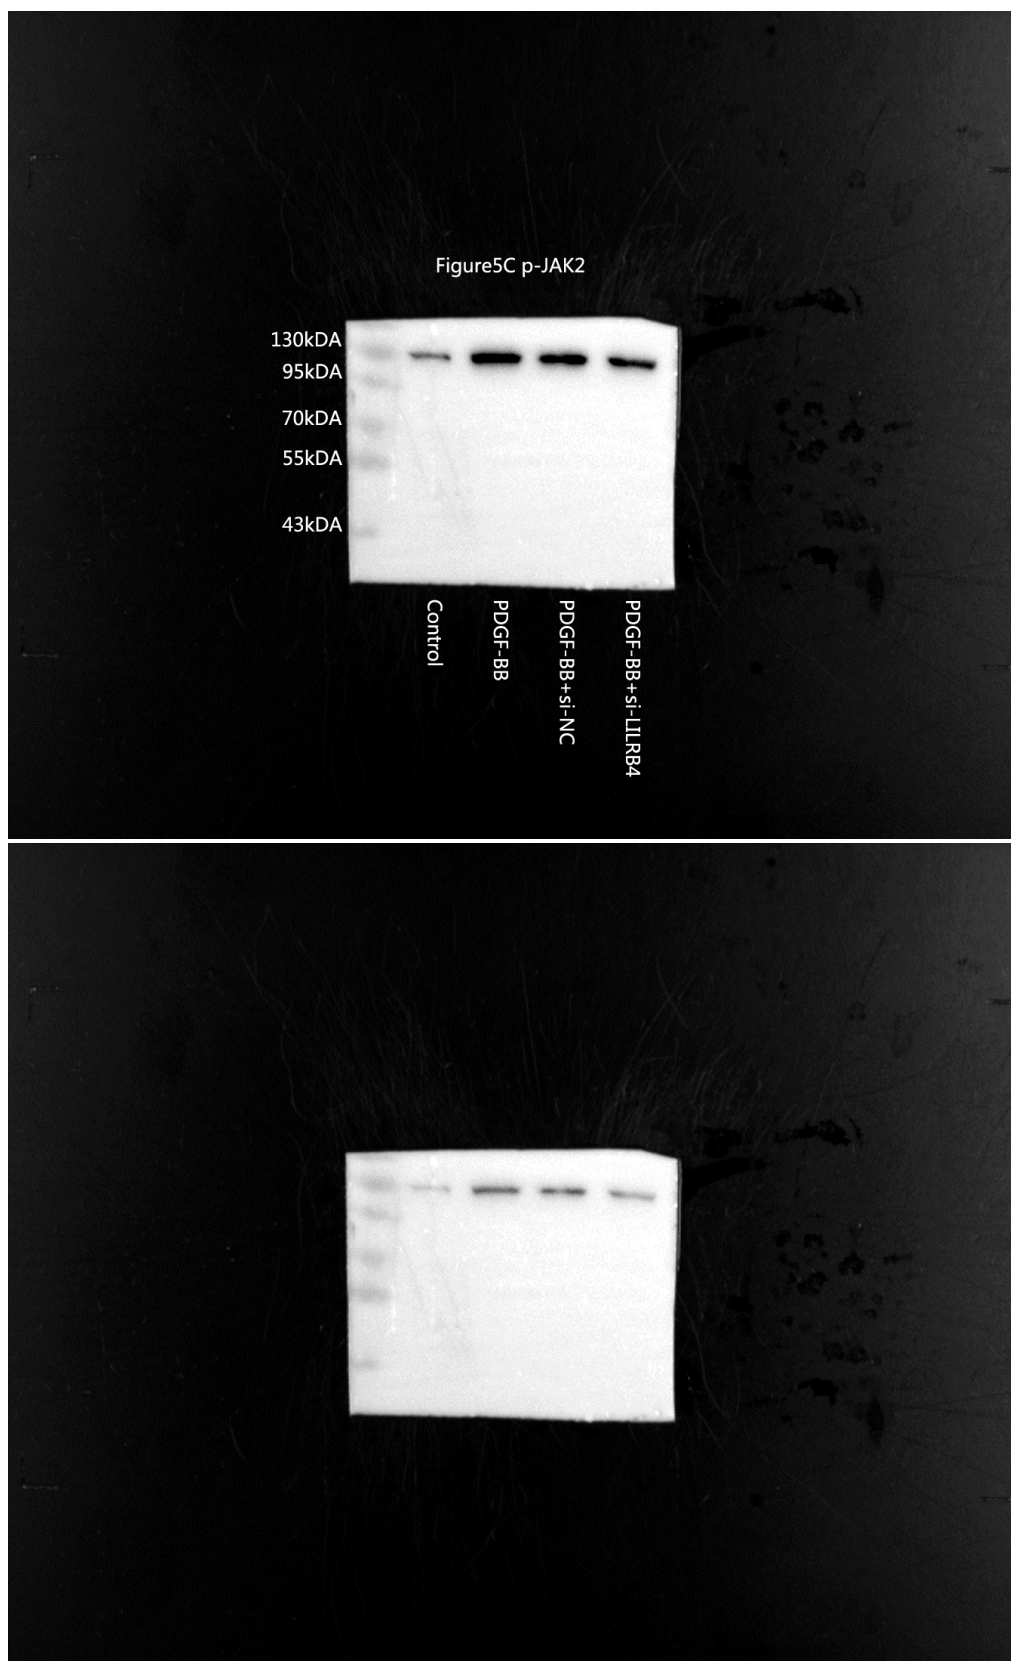

Figure5C p-STAT3

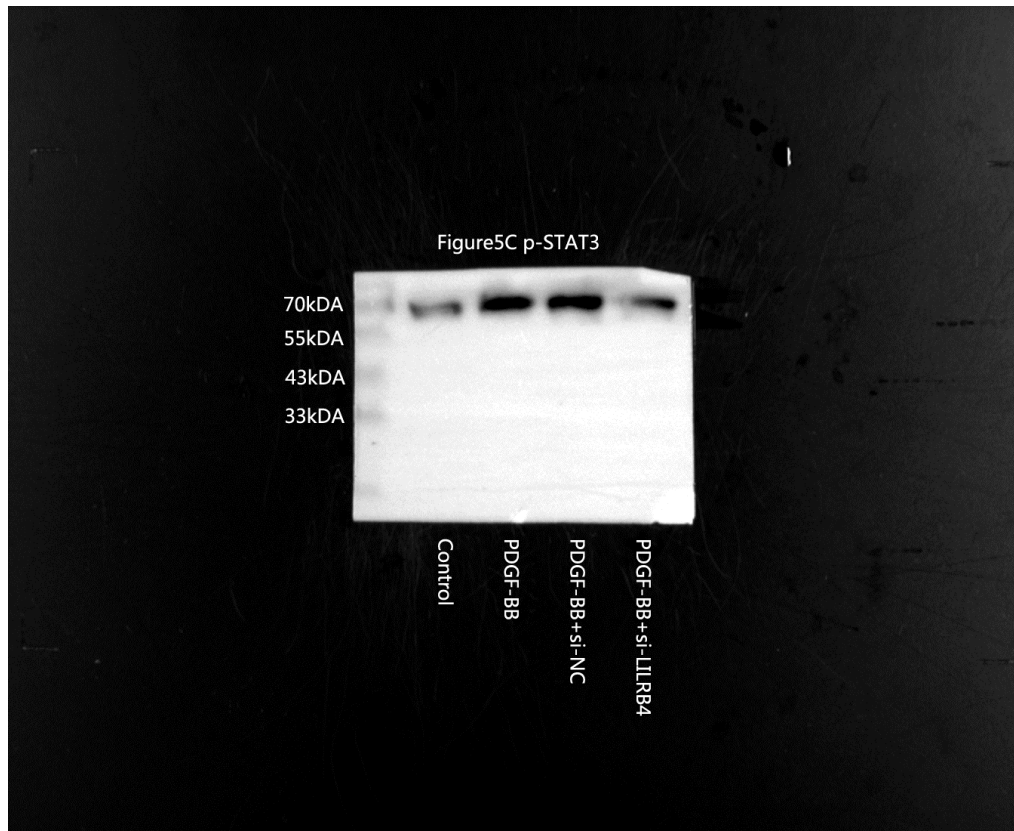

Figure5C STAT3(Contains multiple exposures)

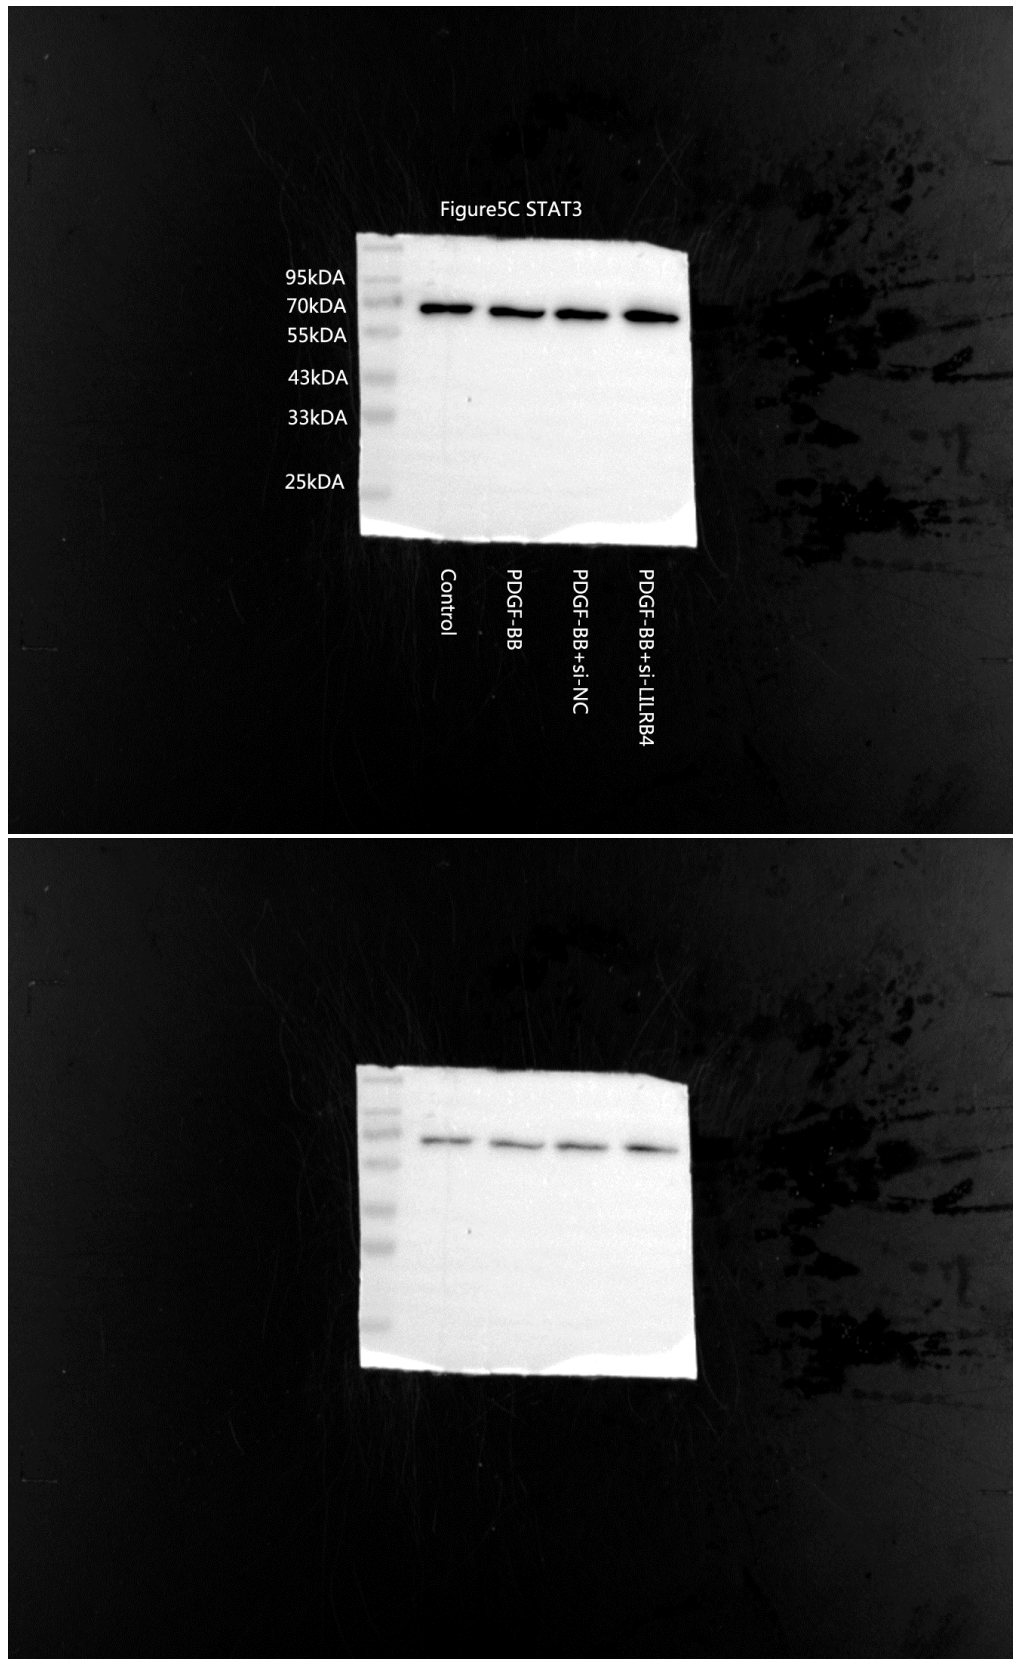



Figure5C  $\beta$ -actin

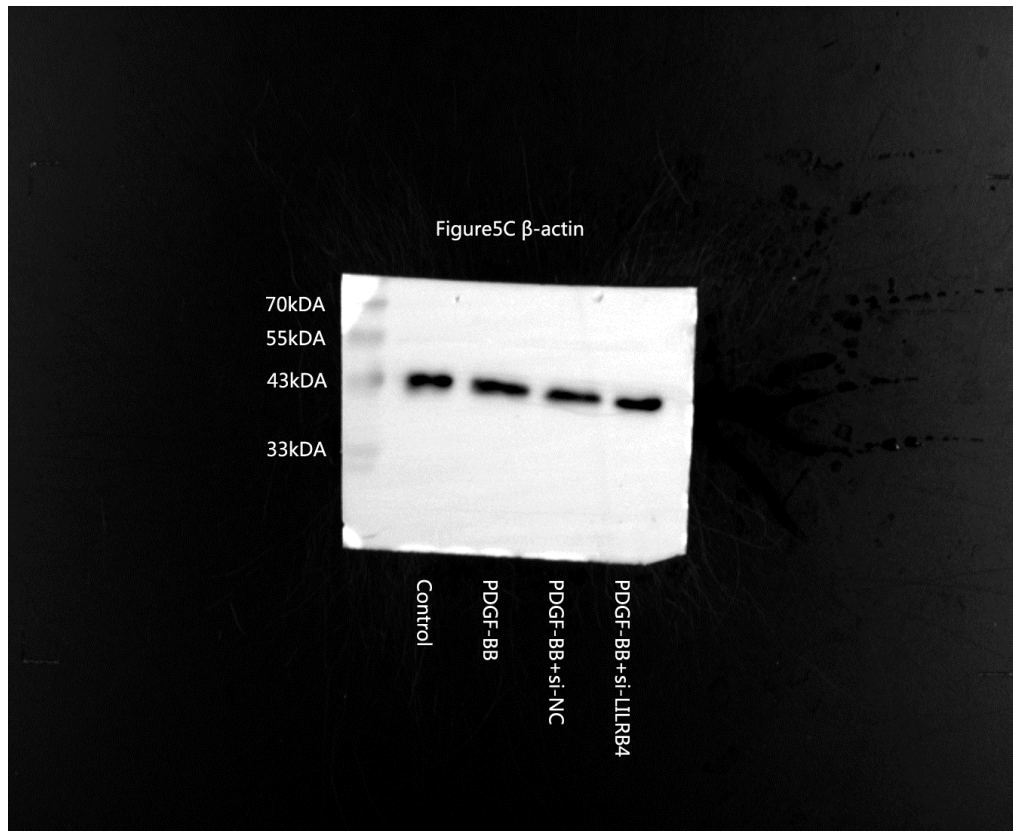

Figure5D p-JAK2

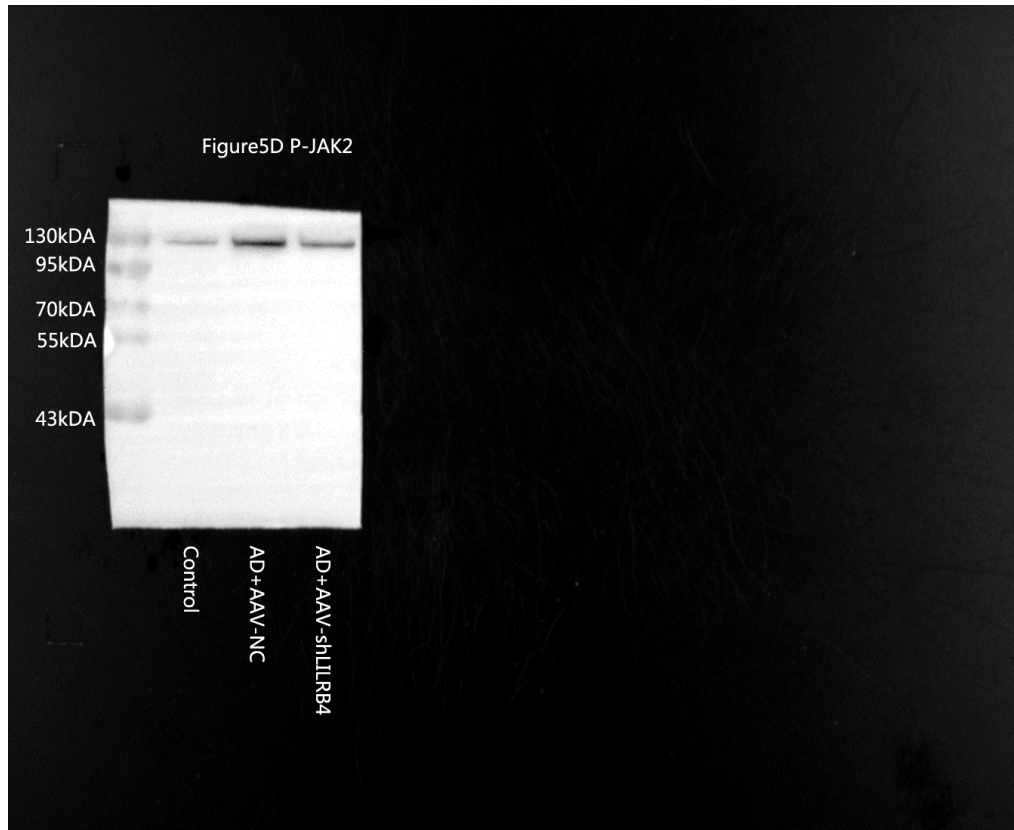

Figure5D JAK2

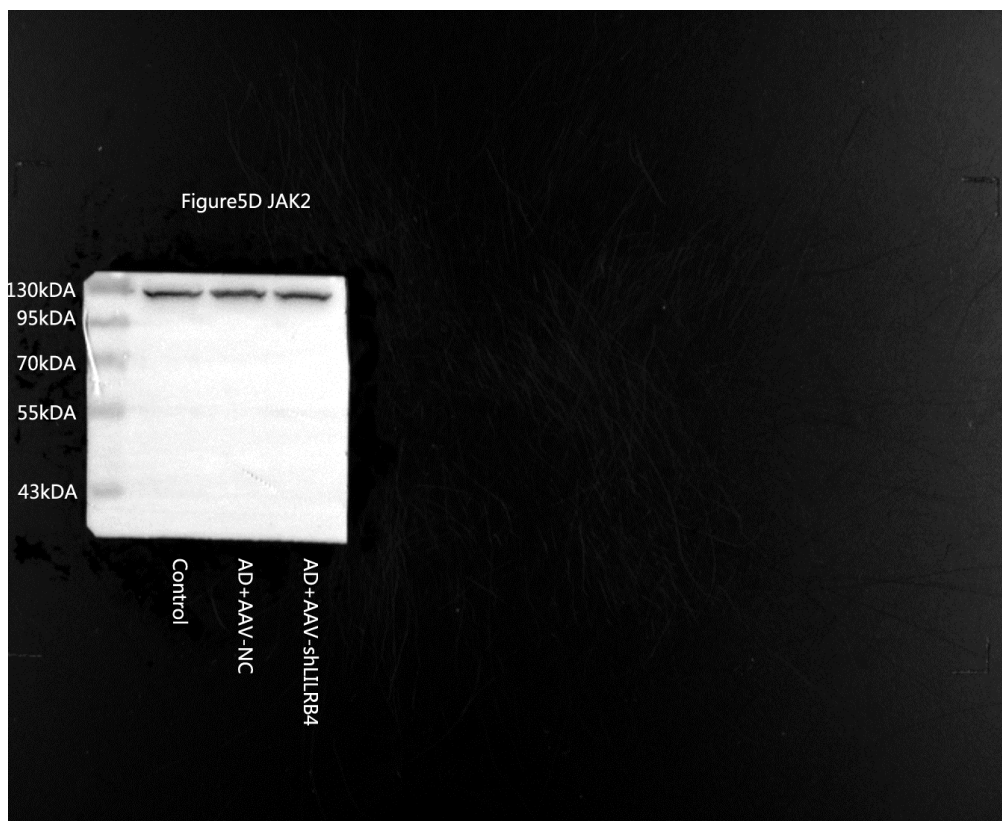

Figure5D p-STAT3

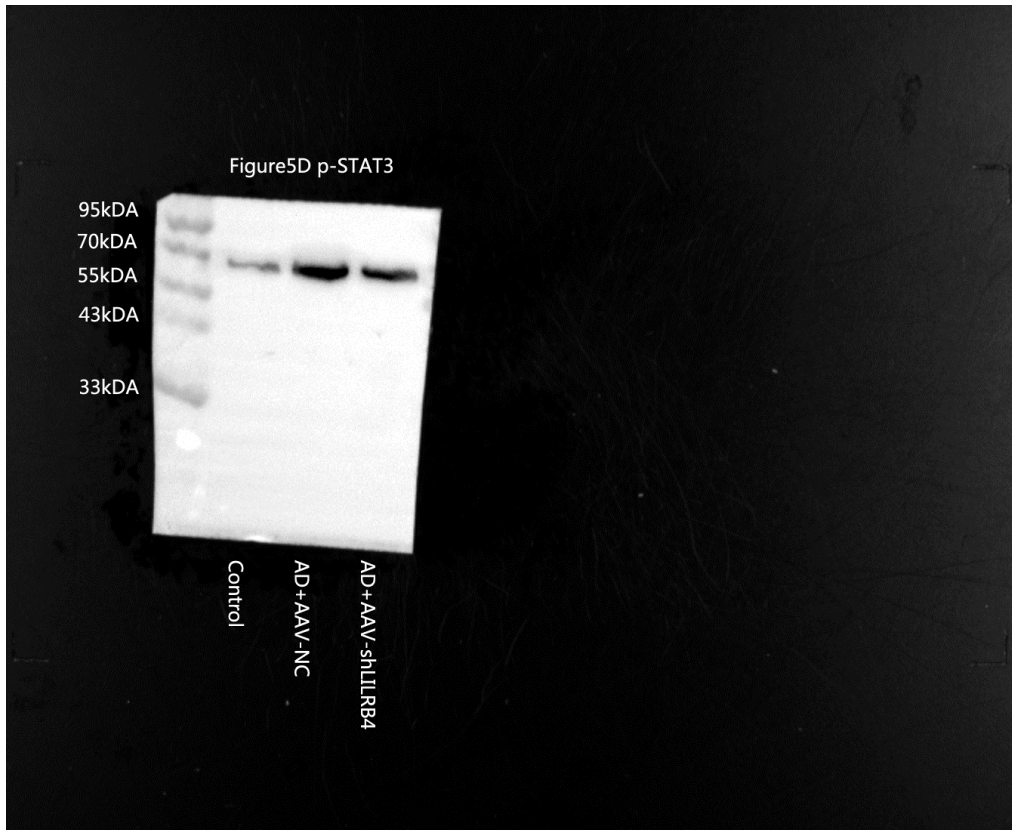

Figure5D STAT3

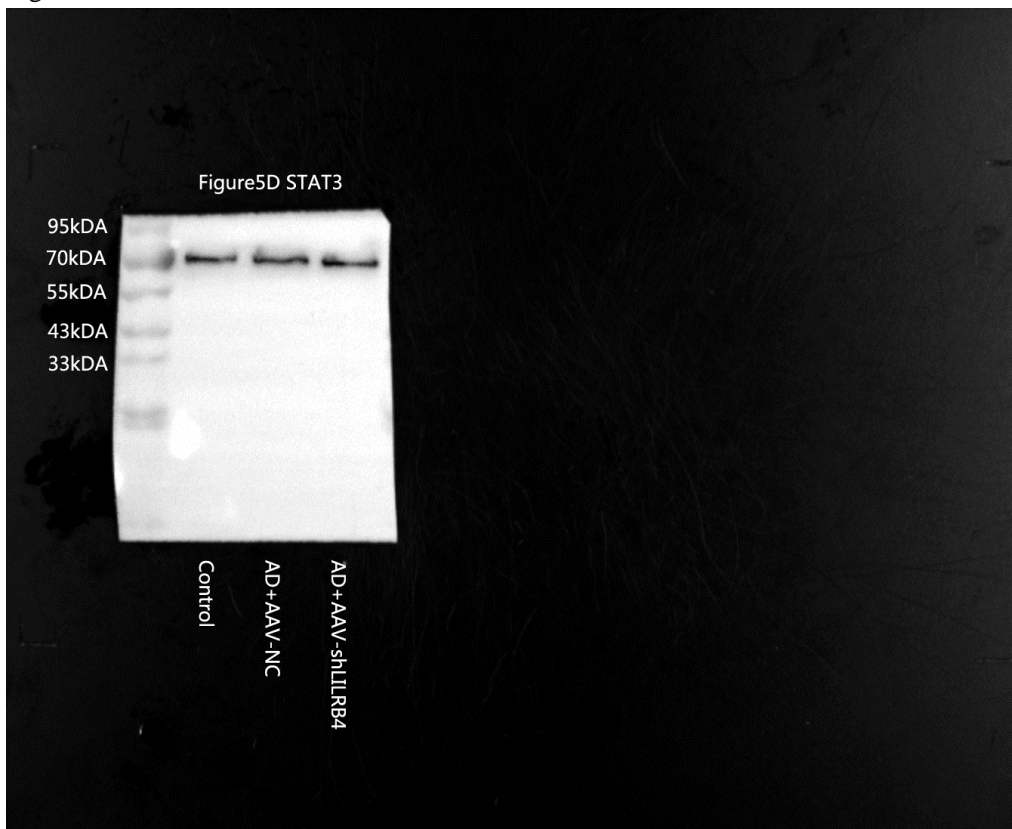

Figure5D  $\beta$ -actin

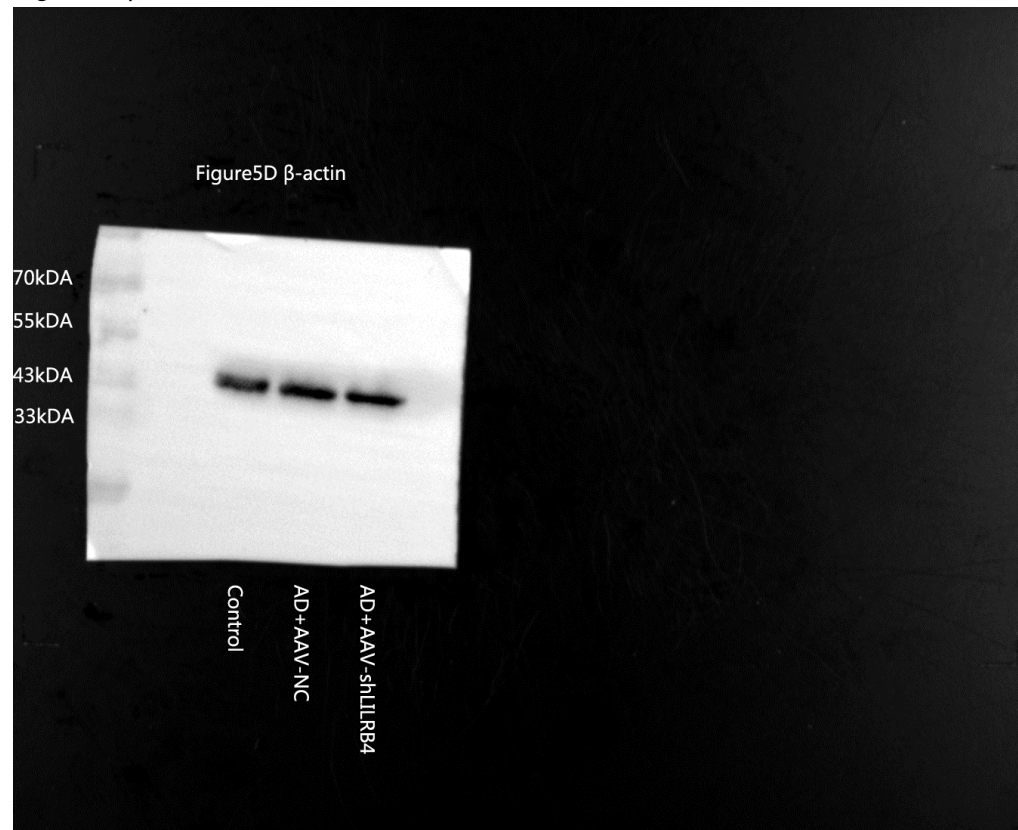

Figure7 LOX

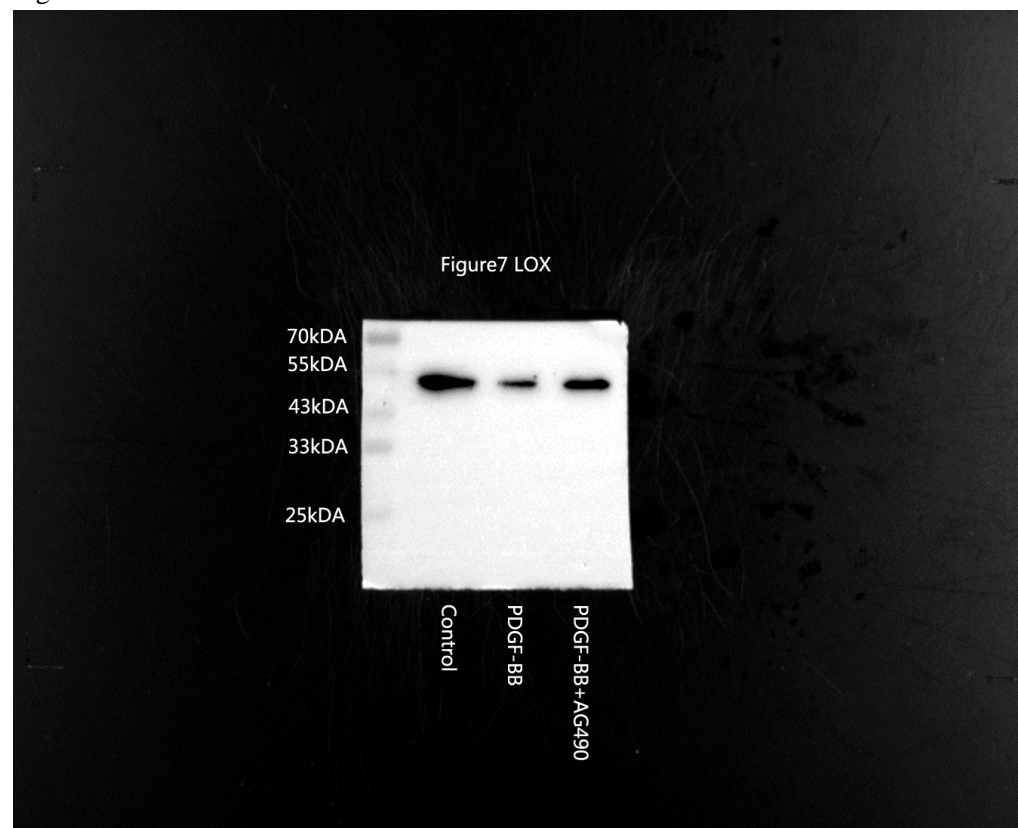

Figure7 MMP-2(Contains multiple exposures)

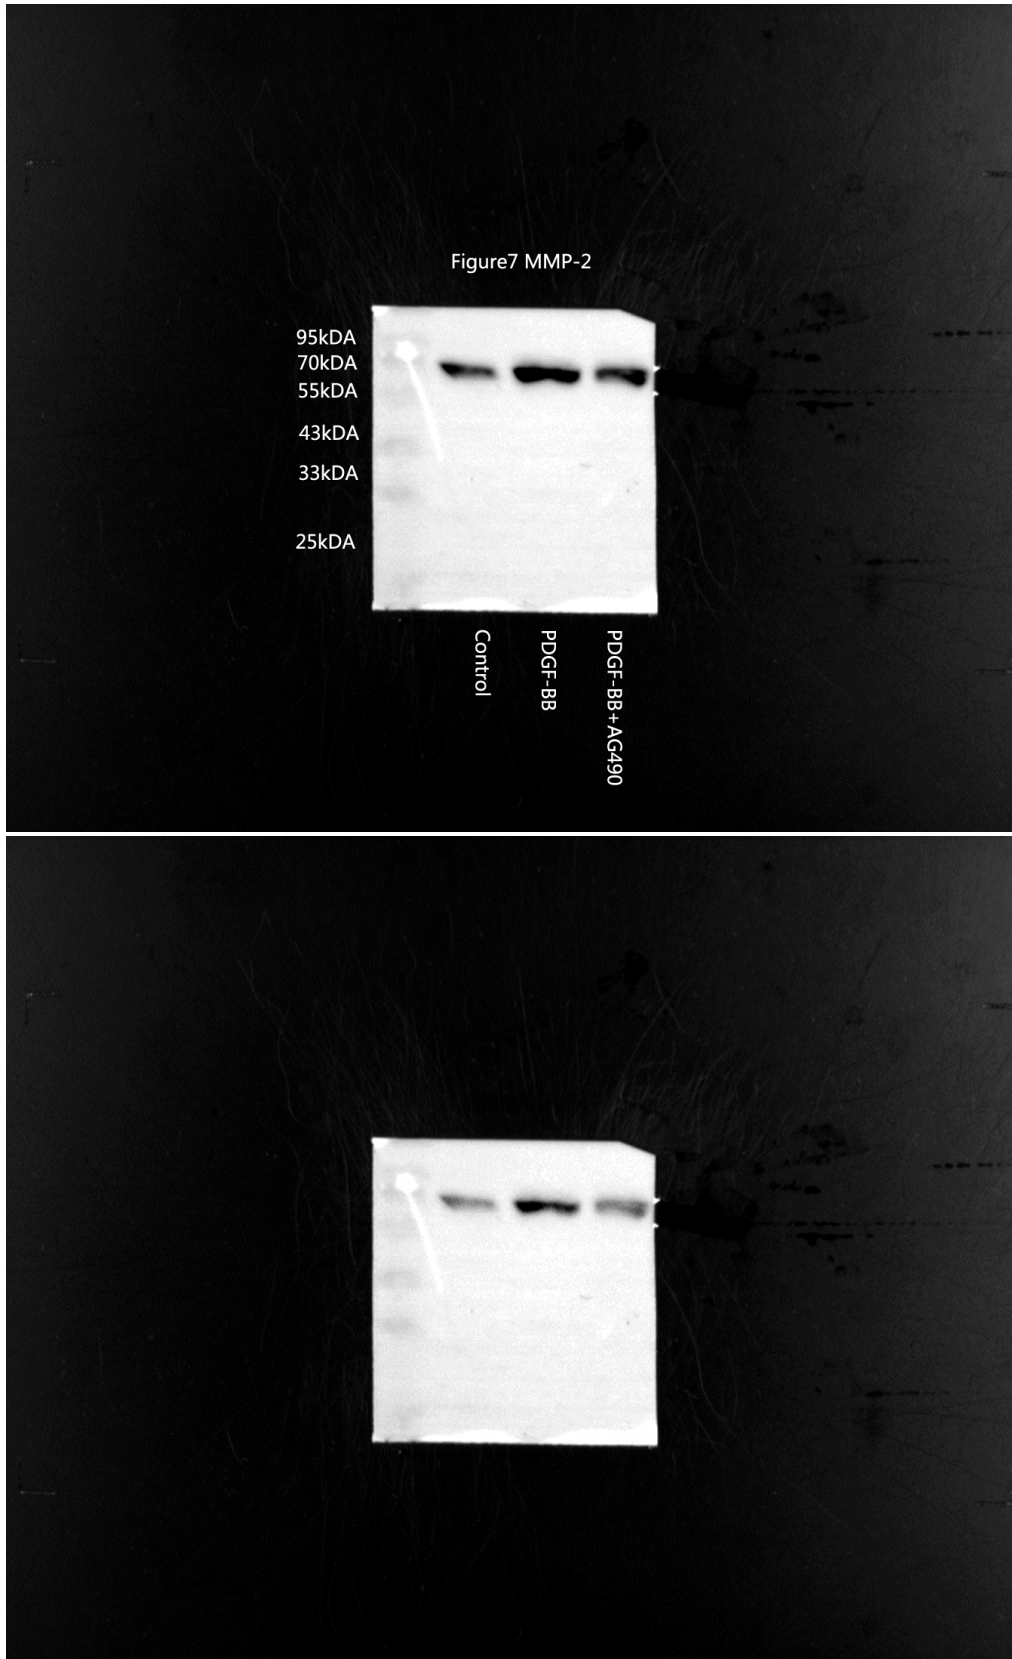



Figure7 MMP-9

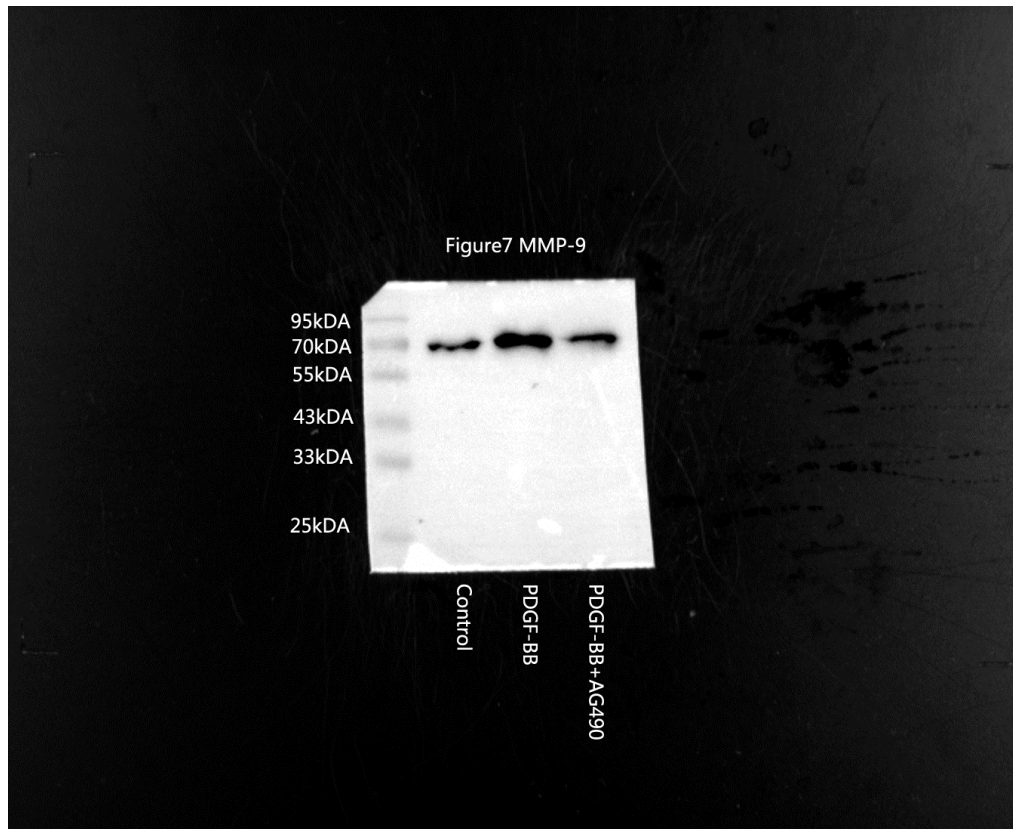



Figure7 S100A4(Contains multiple exposures)

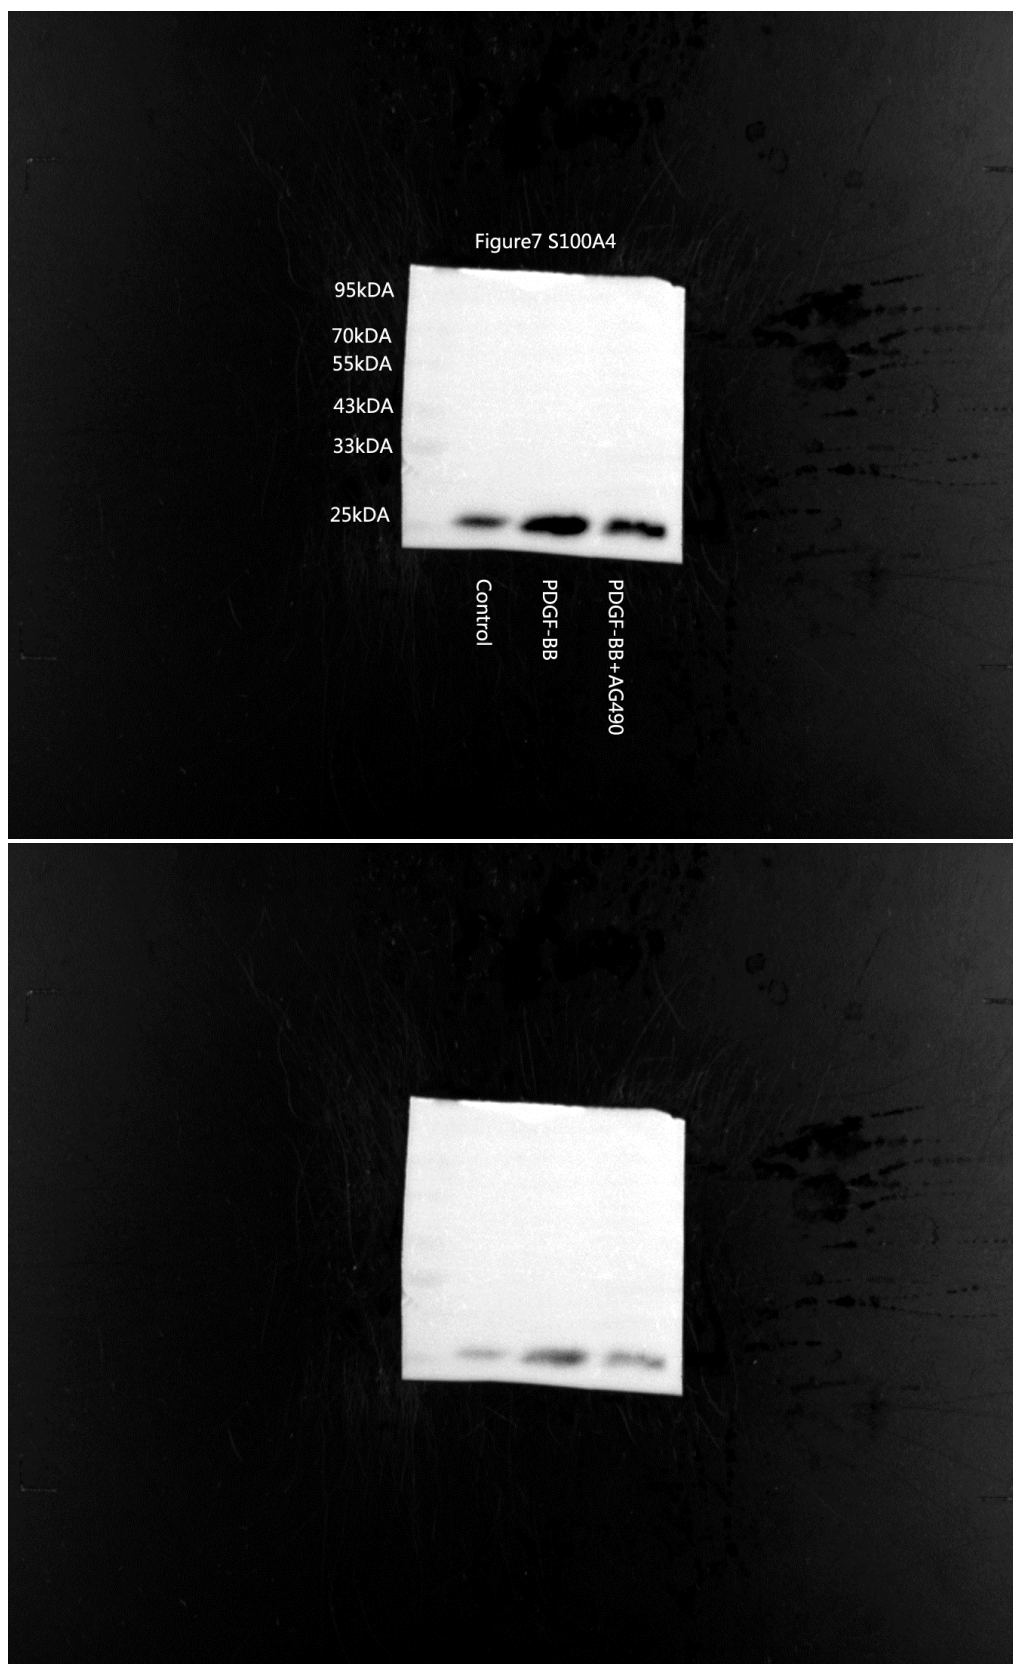

Figure7 Sm22 $\alpha$

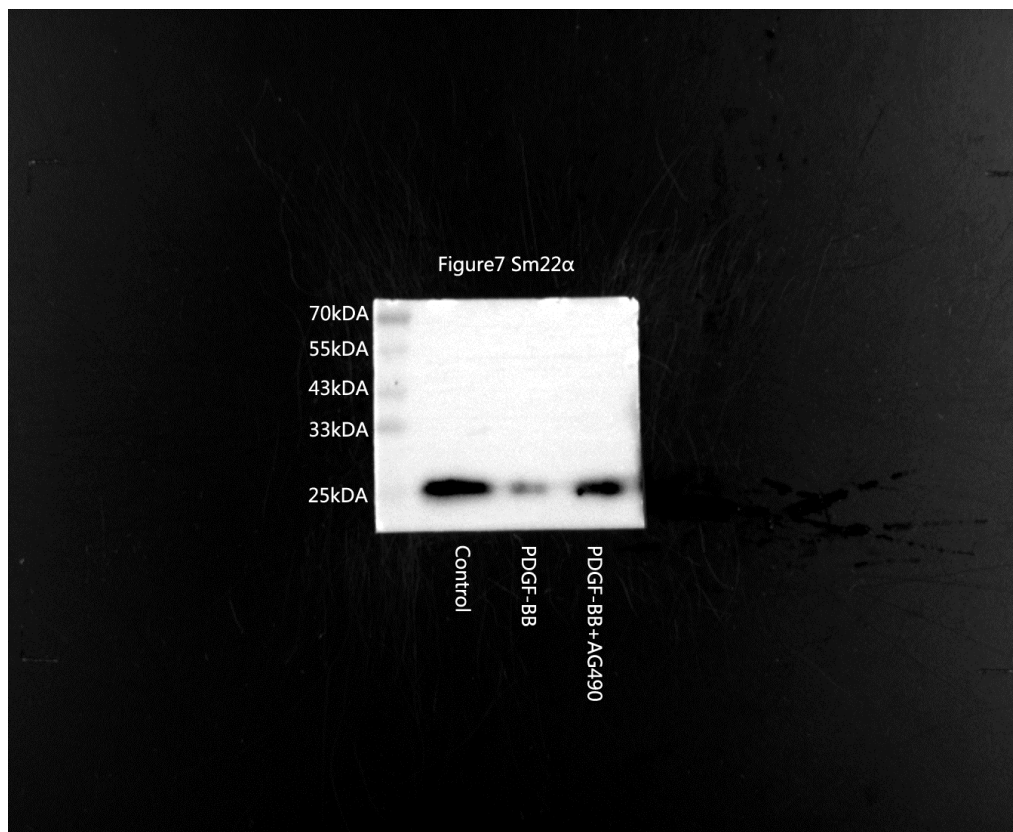

Figure7  $\alpha$ -SMA(Contains multiple exposures)

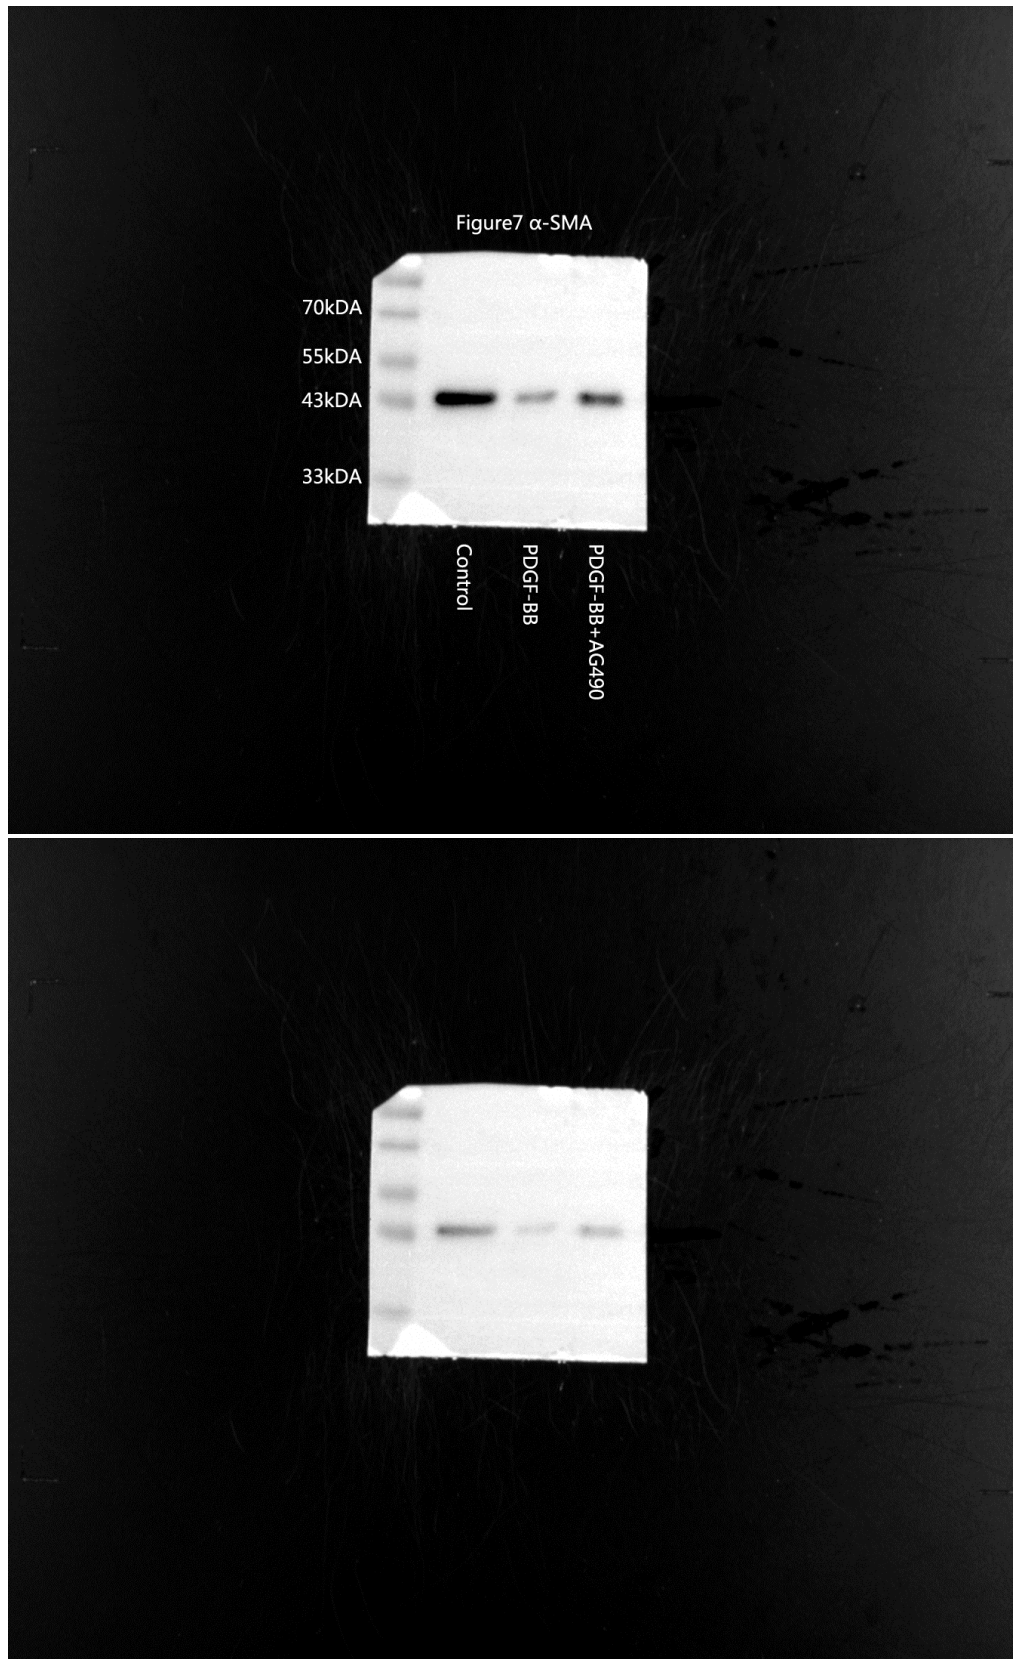

Figure7  $\beta$ -actin(Contains multiple exposures)

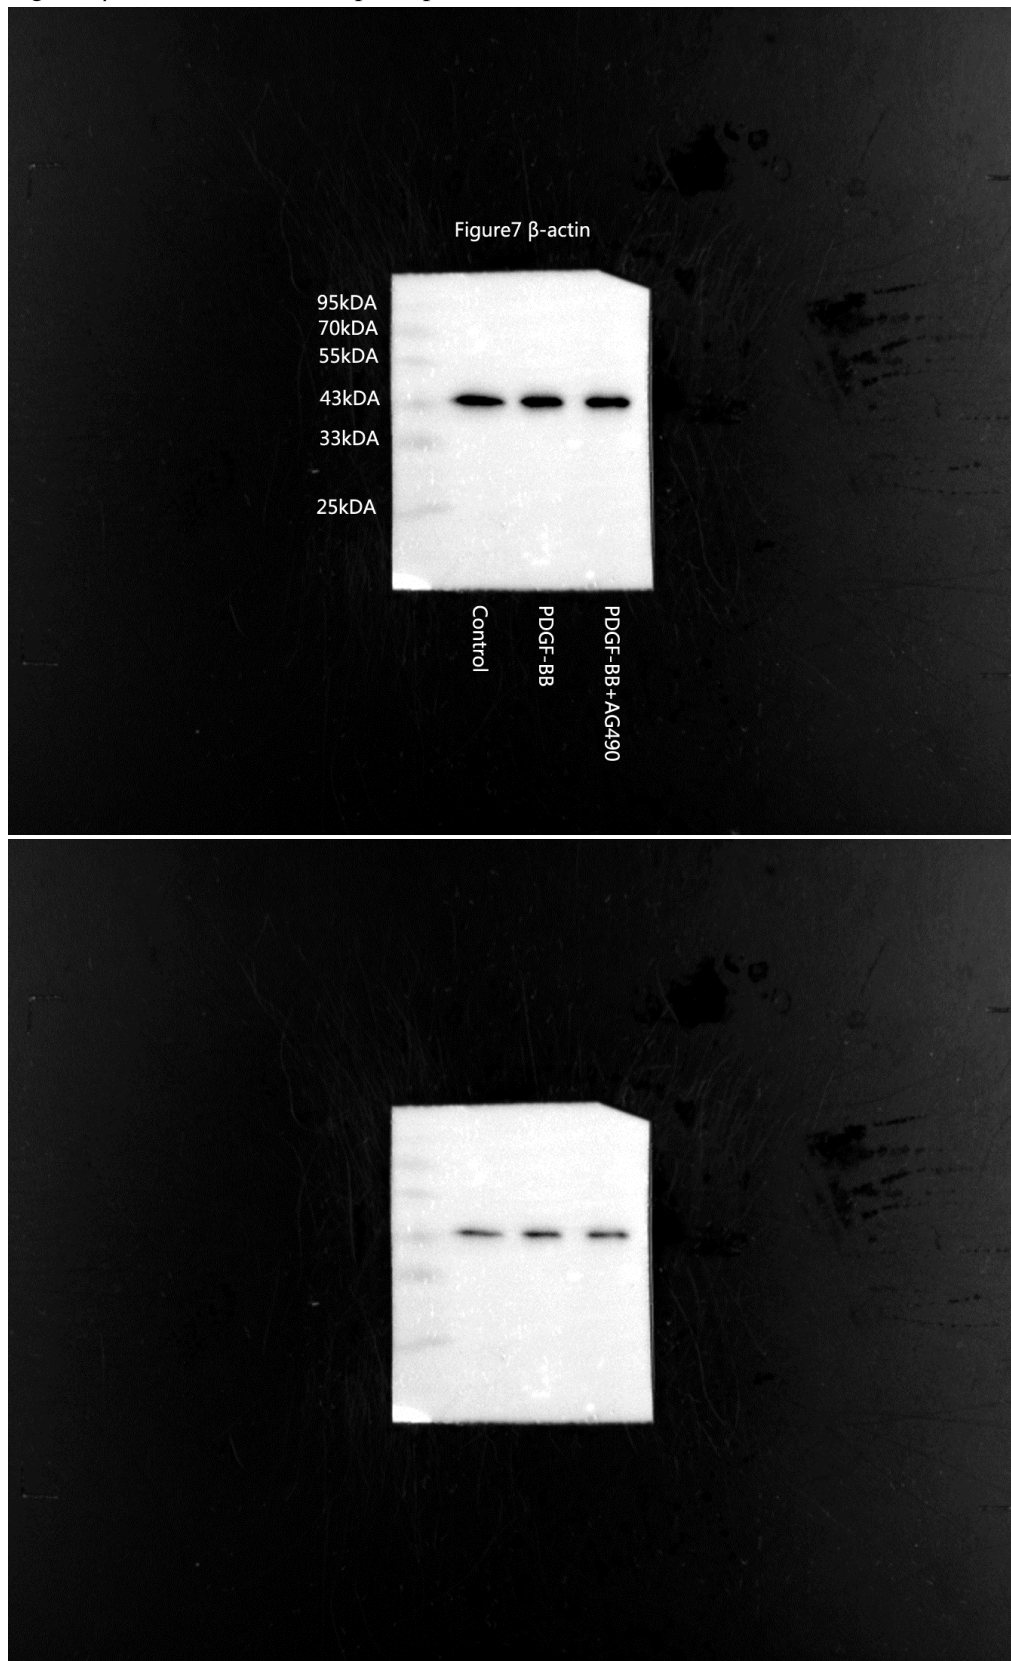

Supplement: 41598_2024_66482_MOESM3_ESM.pdf [file 41598_2024_66482_MOESM3_ESM.pdf]
